# Supplementary material for: Mitigating ion flux vortex enables reversible metal electrodeposition
Source: Research Square preprint supplement (doi:10.21203/rs.3.rs-5657098/v1), 2025-01-20
Supplement: Supplementary file 1 [file ba5df032653e5e68b5762657.docx]

**Supplementary Information**

**Mitigating ion flux vortex enables reversible metal electrodeposition**

Yuhang Dai1,2,#, Wenjia Du2,#, Haobo Dong1,5,#, Xuan Gao1,2,*, Chang Su6, Partha P. Paul3,4, Bratislav Lukic3,4, Chengyi Zhang8, Chumei Ye9, Jinghao Li7, Wei Zong2, Jianwei Li1, Yiyang Liu1, Alexander Rack4, Liqiang Mai7,*, Paul R. Shearing2,*, Guanjie He1,*

1 Christopher Ingold Laboratory, Department of Chemistry, University College London, London WC1H 0AJ, UK

2 Department of Engineering Science, University of Oxford, Oxford OX1 3PJ, UK

3 Henry Royce Institute, Department of Materials, The University of Manchester, Manchester M13 9PL, UK

4 ESRF - The European Synchrotron, 71 Avenue des Martyrs, Grenoble, 38000, France

5 School of Future Technology, South China University of Technology, Guangzhou 510641, China

6 Nuffield College, University of Oxford, Oxford OX1 1NF, UK

7 State Key Laboratory of Advanced Technology for Materials Synthesis and Processing, Wuhan University of Technology, Wuhan 430070, China

8 School of Chemical Sciences, University of Auckland, Auckland 1010, New Zealand

9 Department of Materials Science and Metallurgy, University of Cambridge, Cambridge CB3 0FS, UK

# These authors contributed equally to this work

* Email: xuan.gao@eng.ox.ac.uk; mlq518@whut.edu.cn; paul.shearing@eng.ox.ac.uk; g.he@ucl.ac.uk.


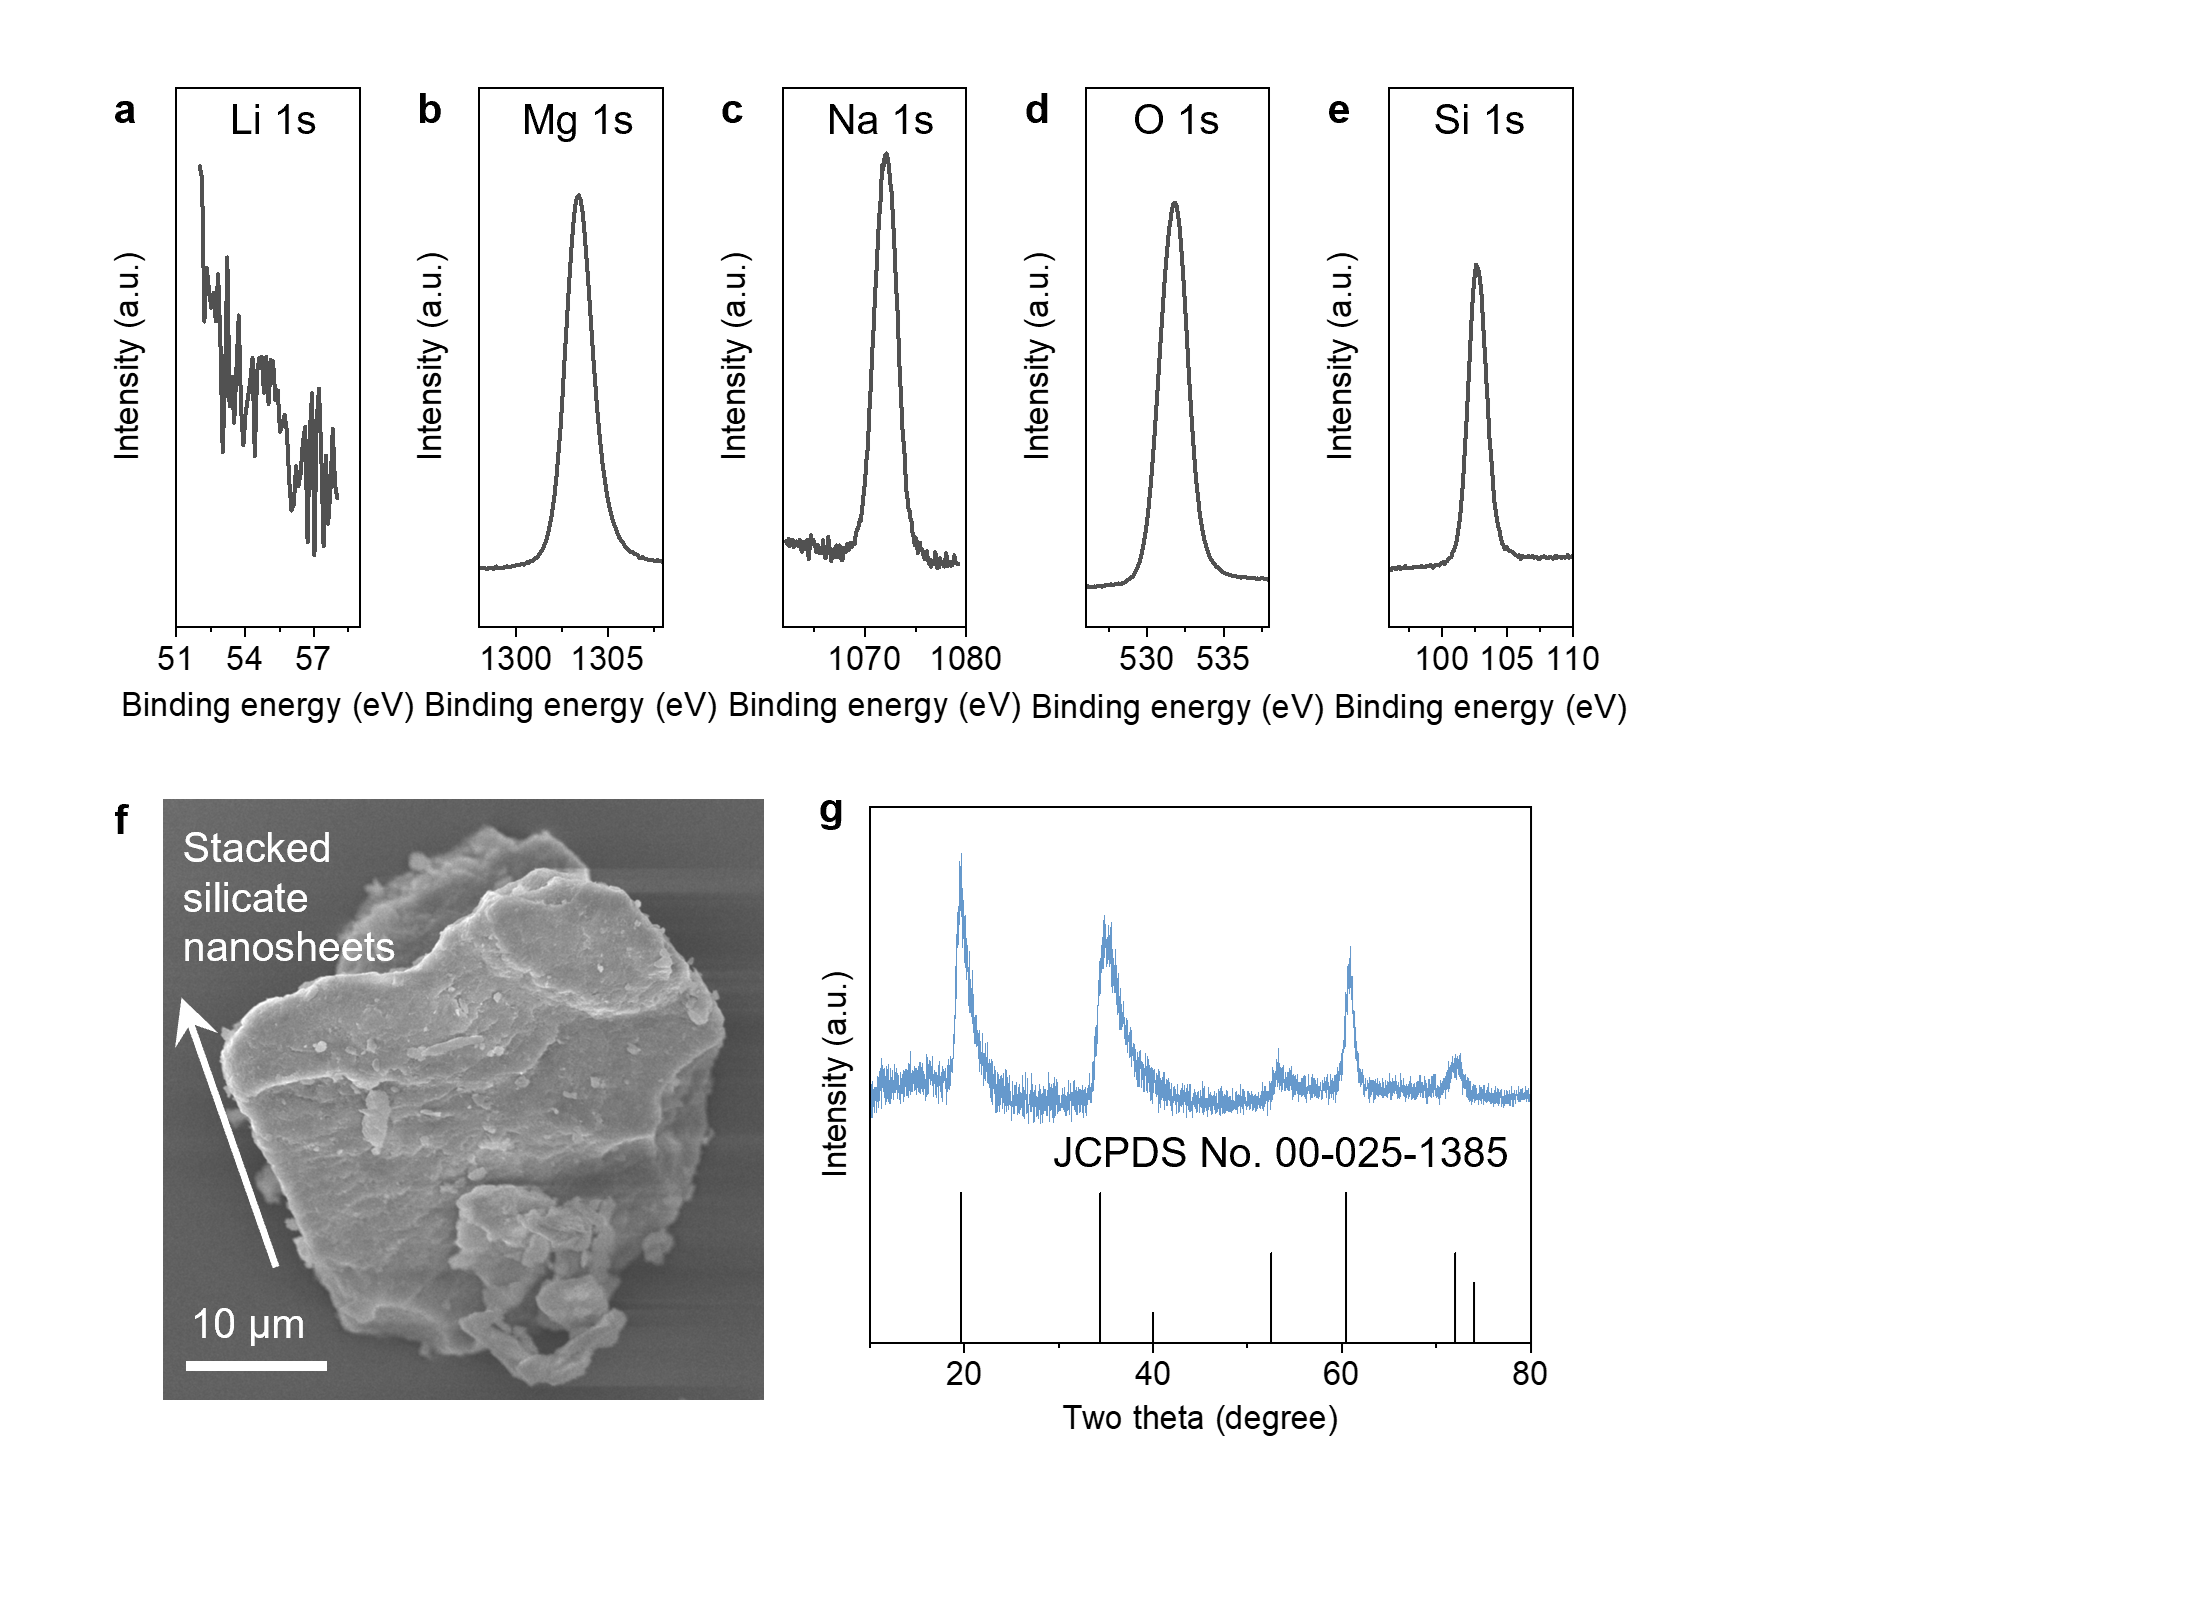


**Supplementary Figure 1. Characterizations of LAPONITE powder.** **a-e,** XPS spectra. **f,** SEM image. **g,** XRD pattern. The JCPDS No. 00-025-1385 corresponds to Na0.2(Mg, Li)3Si4O10(OH)2·4H2O.


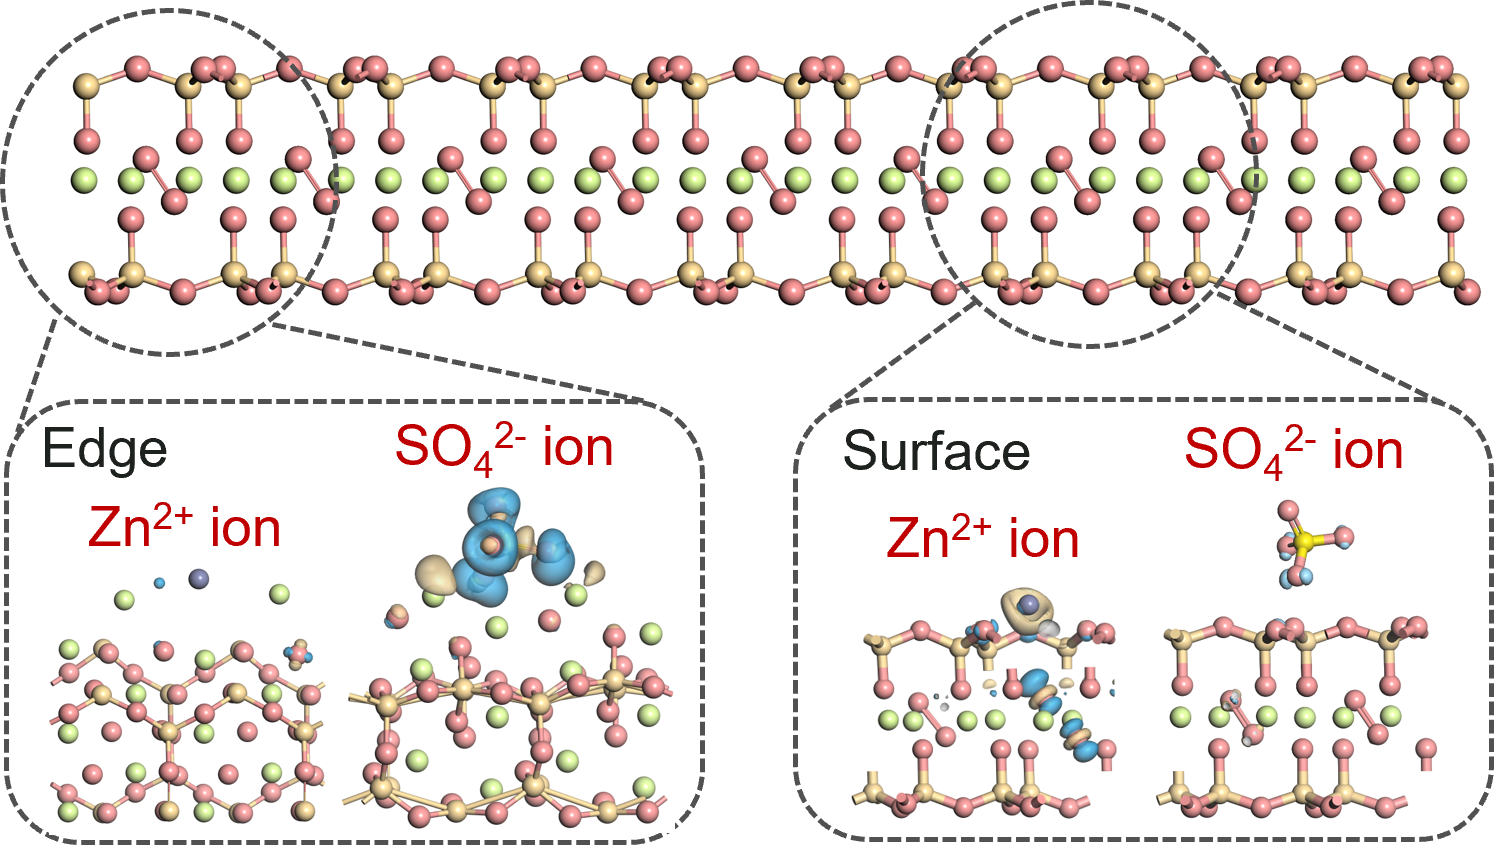


**Supplementary Figure 2.** **Density functional theory (DFT) calculation result of LAPONITE lamella.** Analysis of charge density difference to investigate the adsorption behavior of Zn2+ and SO42- on distinct sites (edge or surface) of LAPONITE. The chain structure of LAPONITE consists of [SiO4] tetrahedra with Mg atoms between the chains. The blue area indicates electron loss, while the yellow area presents electron enrichment.


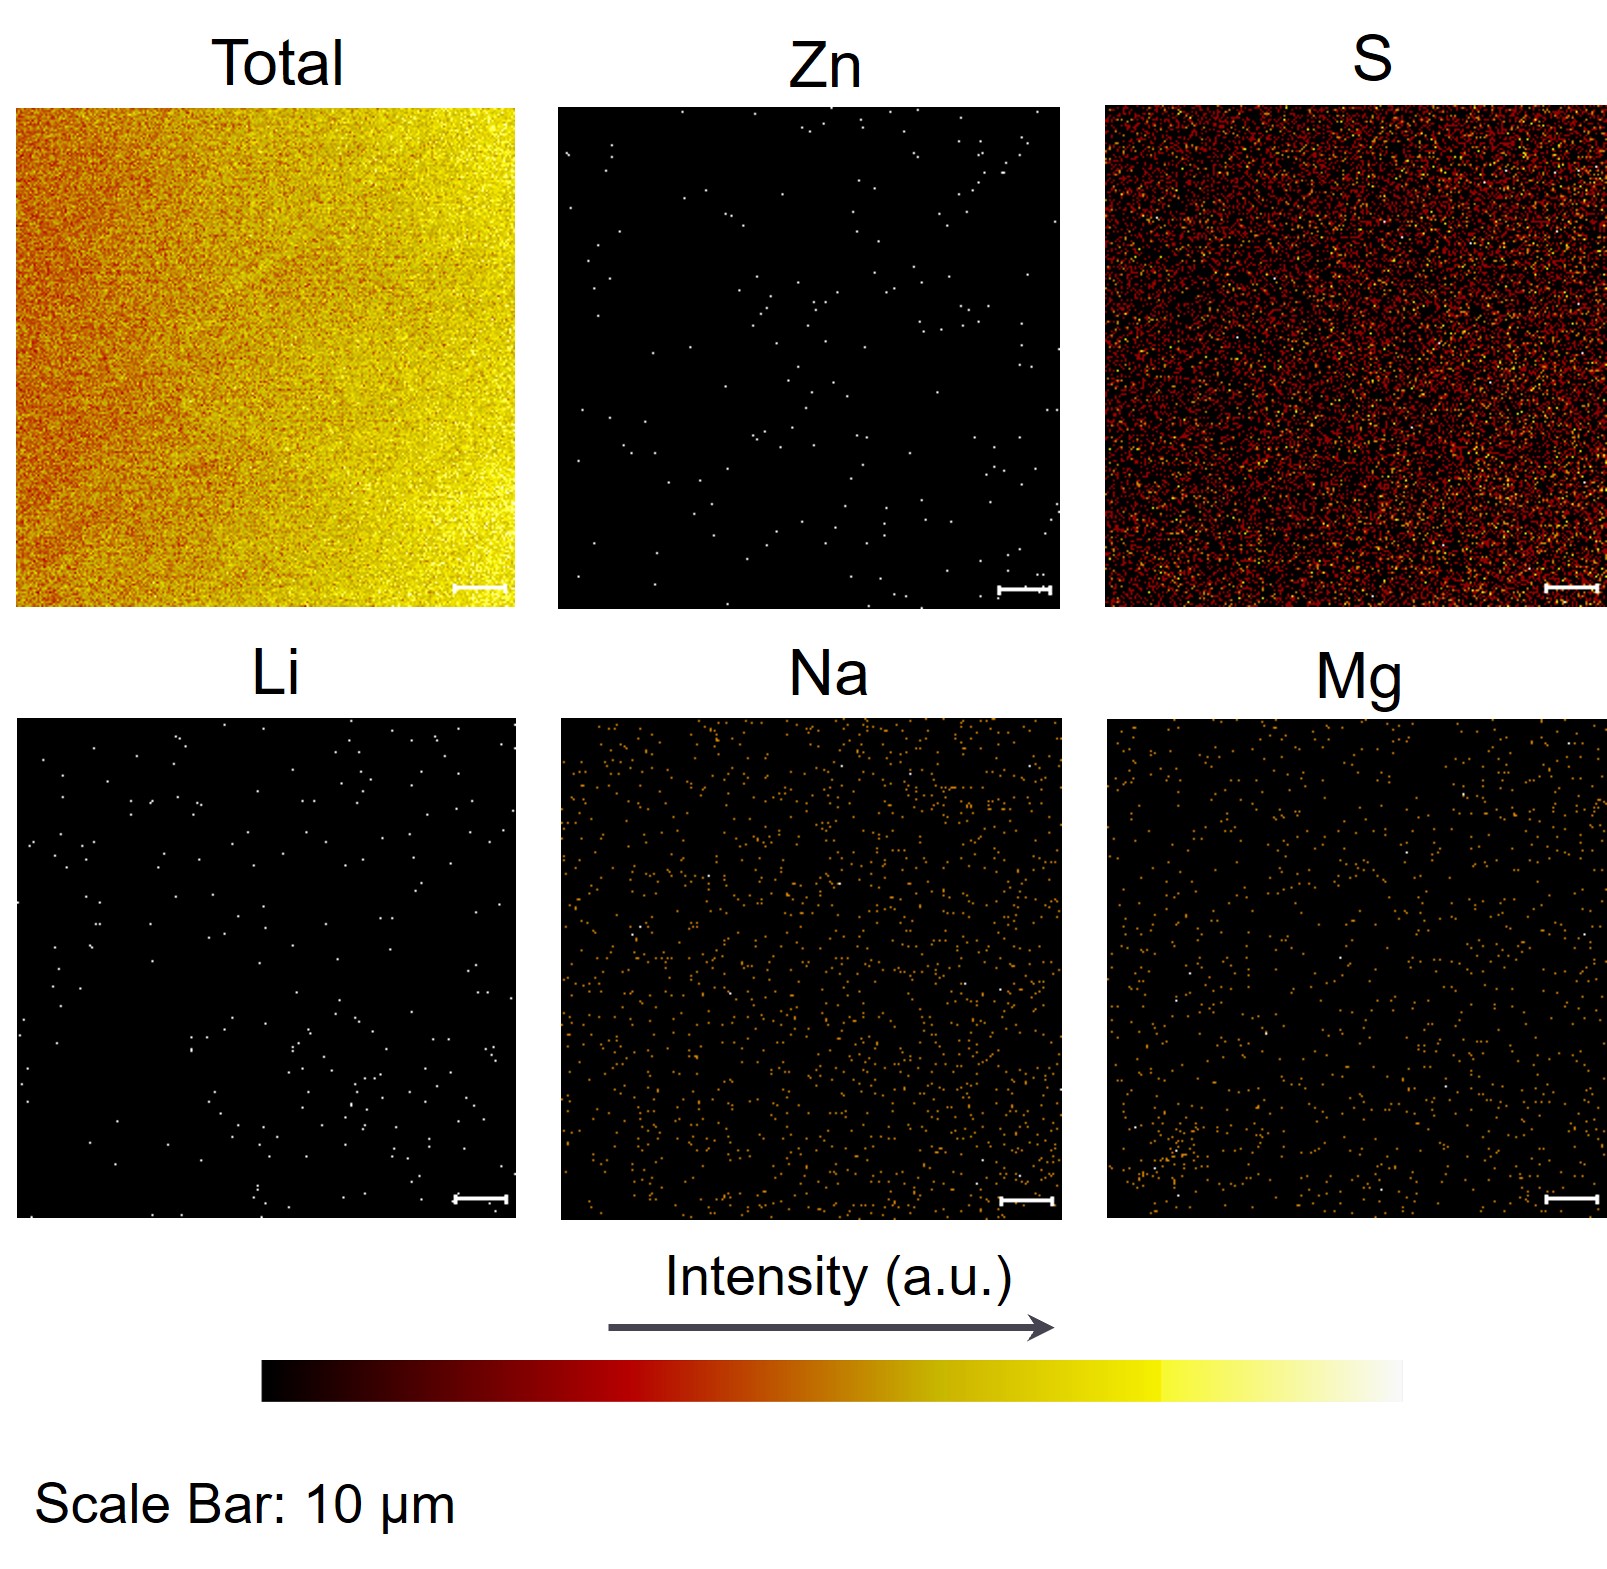


**Supplementary Figure 3. Elemental mapping of the LAPONITE surface from time-of-flight secondary ion mass spectrometry (TOF-SIMS) test.** After 1 cycle of deposition, LAPONITE was peeled off from the LAPO@Zn anode. The TOF-SIMS result was collected from negative mode. The Zn signal is low, while the S signal is high, indicating that LAPONITE selectively adsorbs SO42- while allowing Zn2+ to pass through.


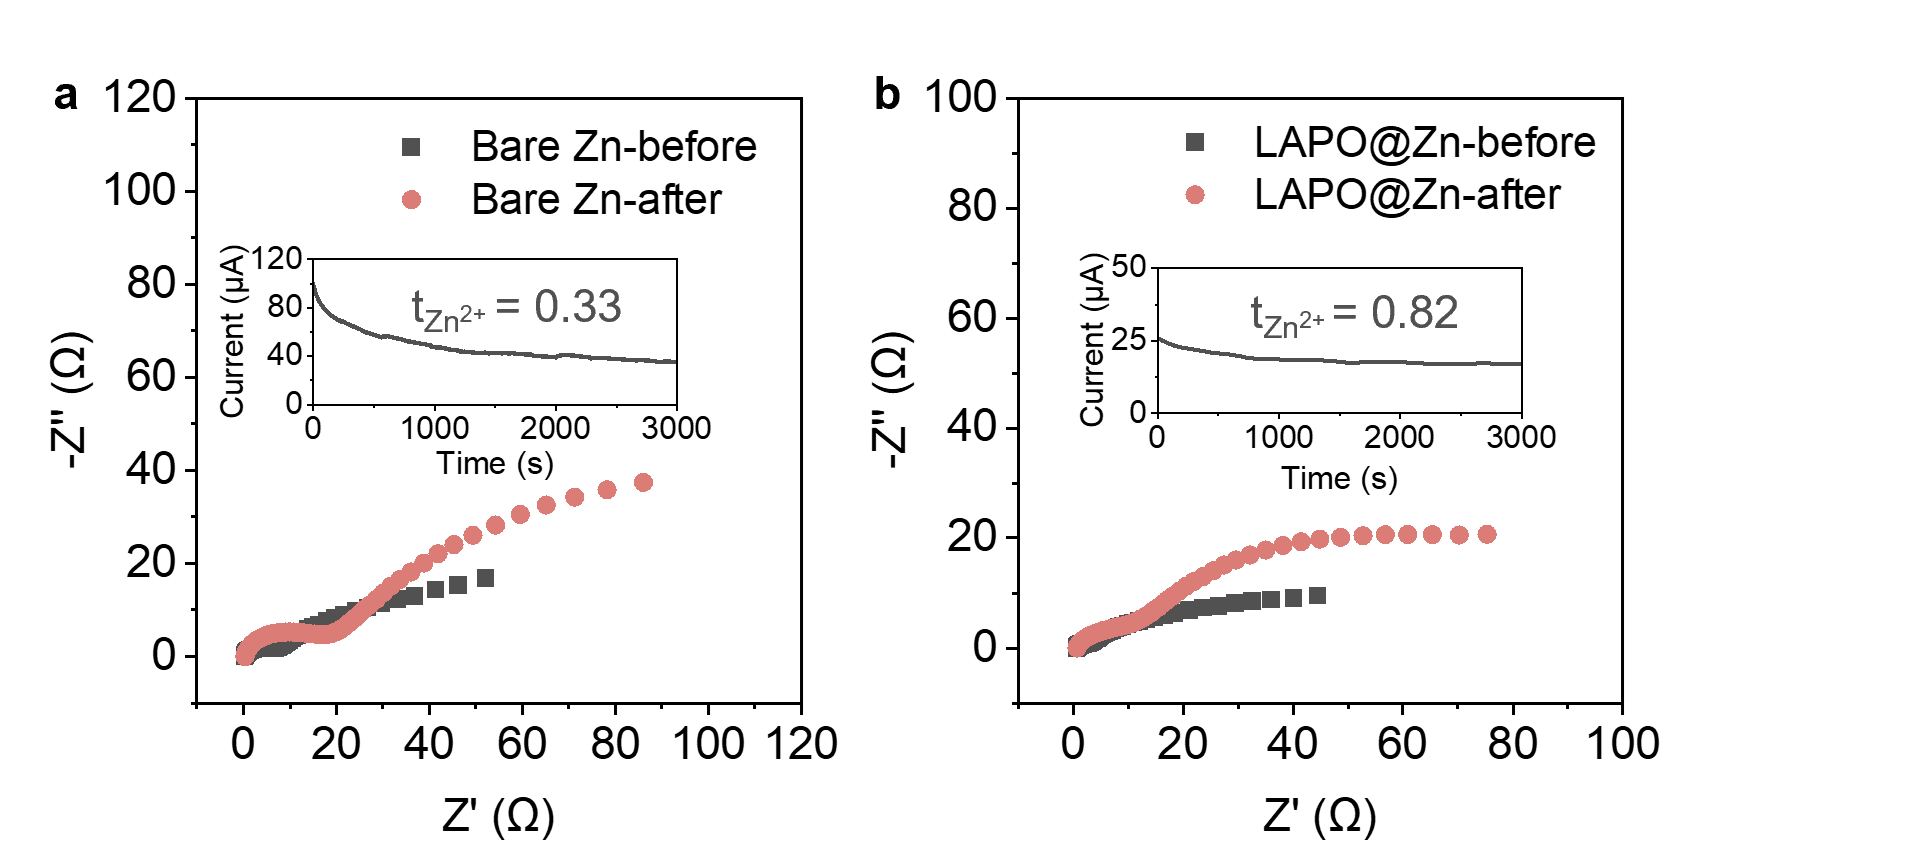


**Supplementary Figure 4. Impedance spectra of bare Zn and LAPO@Zn electrodes before and after polarization.** **a,** Electrochemical impedance spectroscopy (EIS) spectra based on bare Zn electrodes. **b,** EIS spectra based on LAPO@Zn electrodes. The inset shows the variation of current with time during polarization at an applied voltage of 10 mV and room temperature.

The transference number (*t*Zn2+) values were measured by the potentiostatic polarization method, and determined by the *Evans* equation as below:

(1)

where *I0* and *Is* represent the currents at the initial and steady states, respectively. *R0* and *Rs* represent the interfacial resistances prior to and following polarization, respectively. The *t*Zn2+ values of bare Zn and LAPO@Zn are 0.33 and 0.82, respectively.


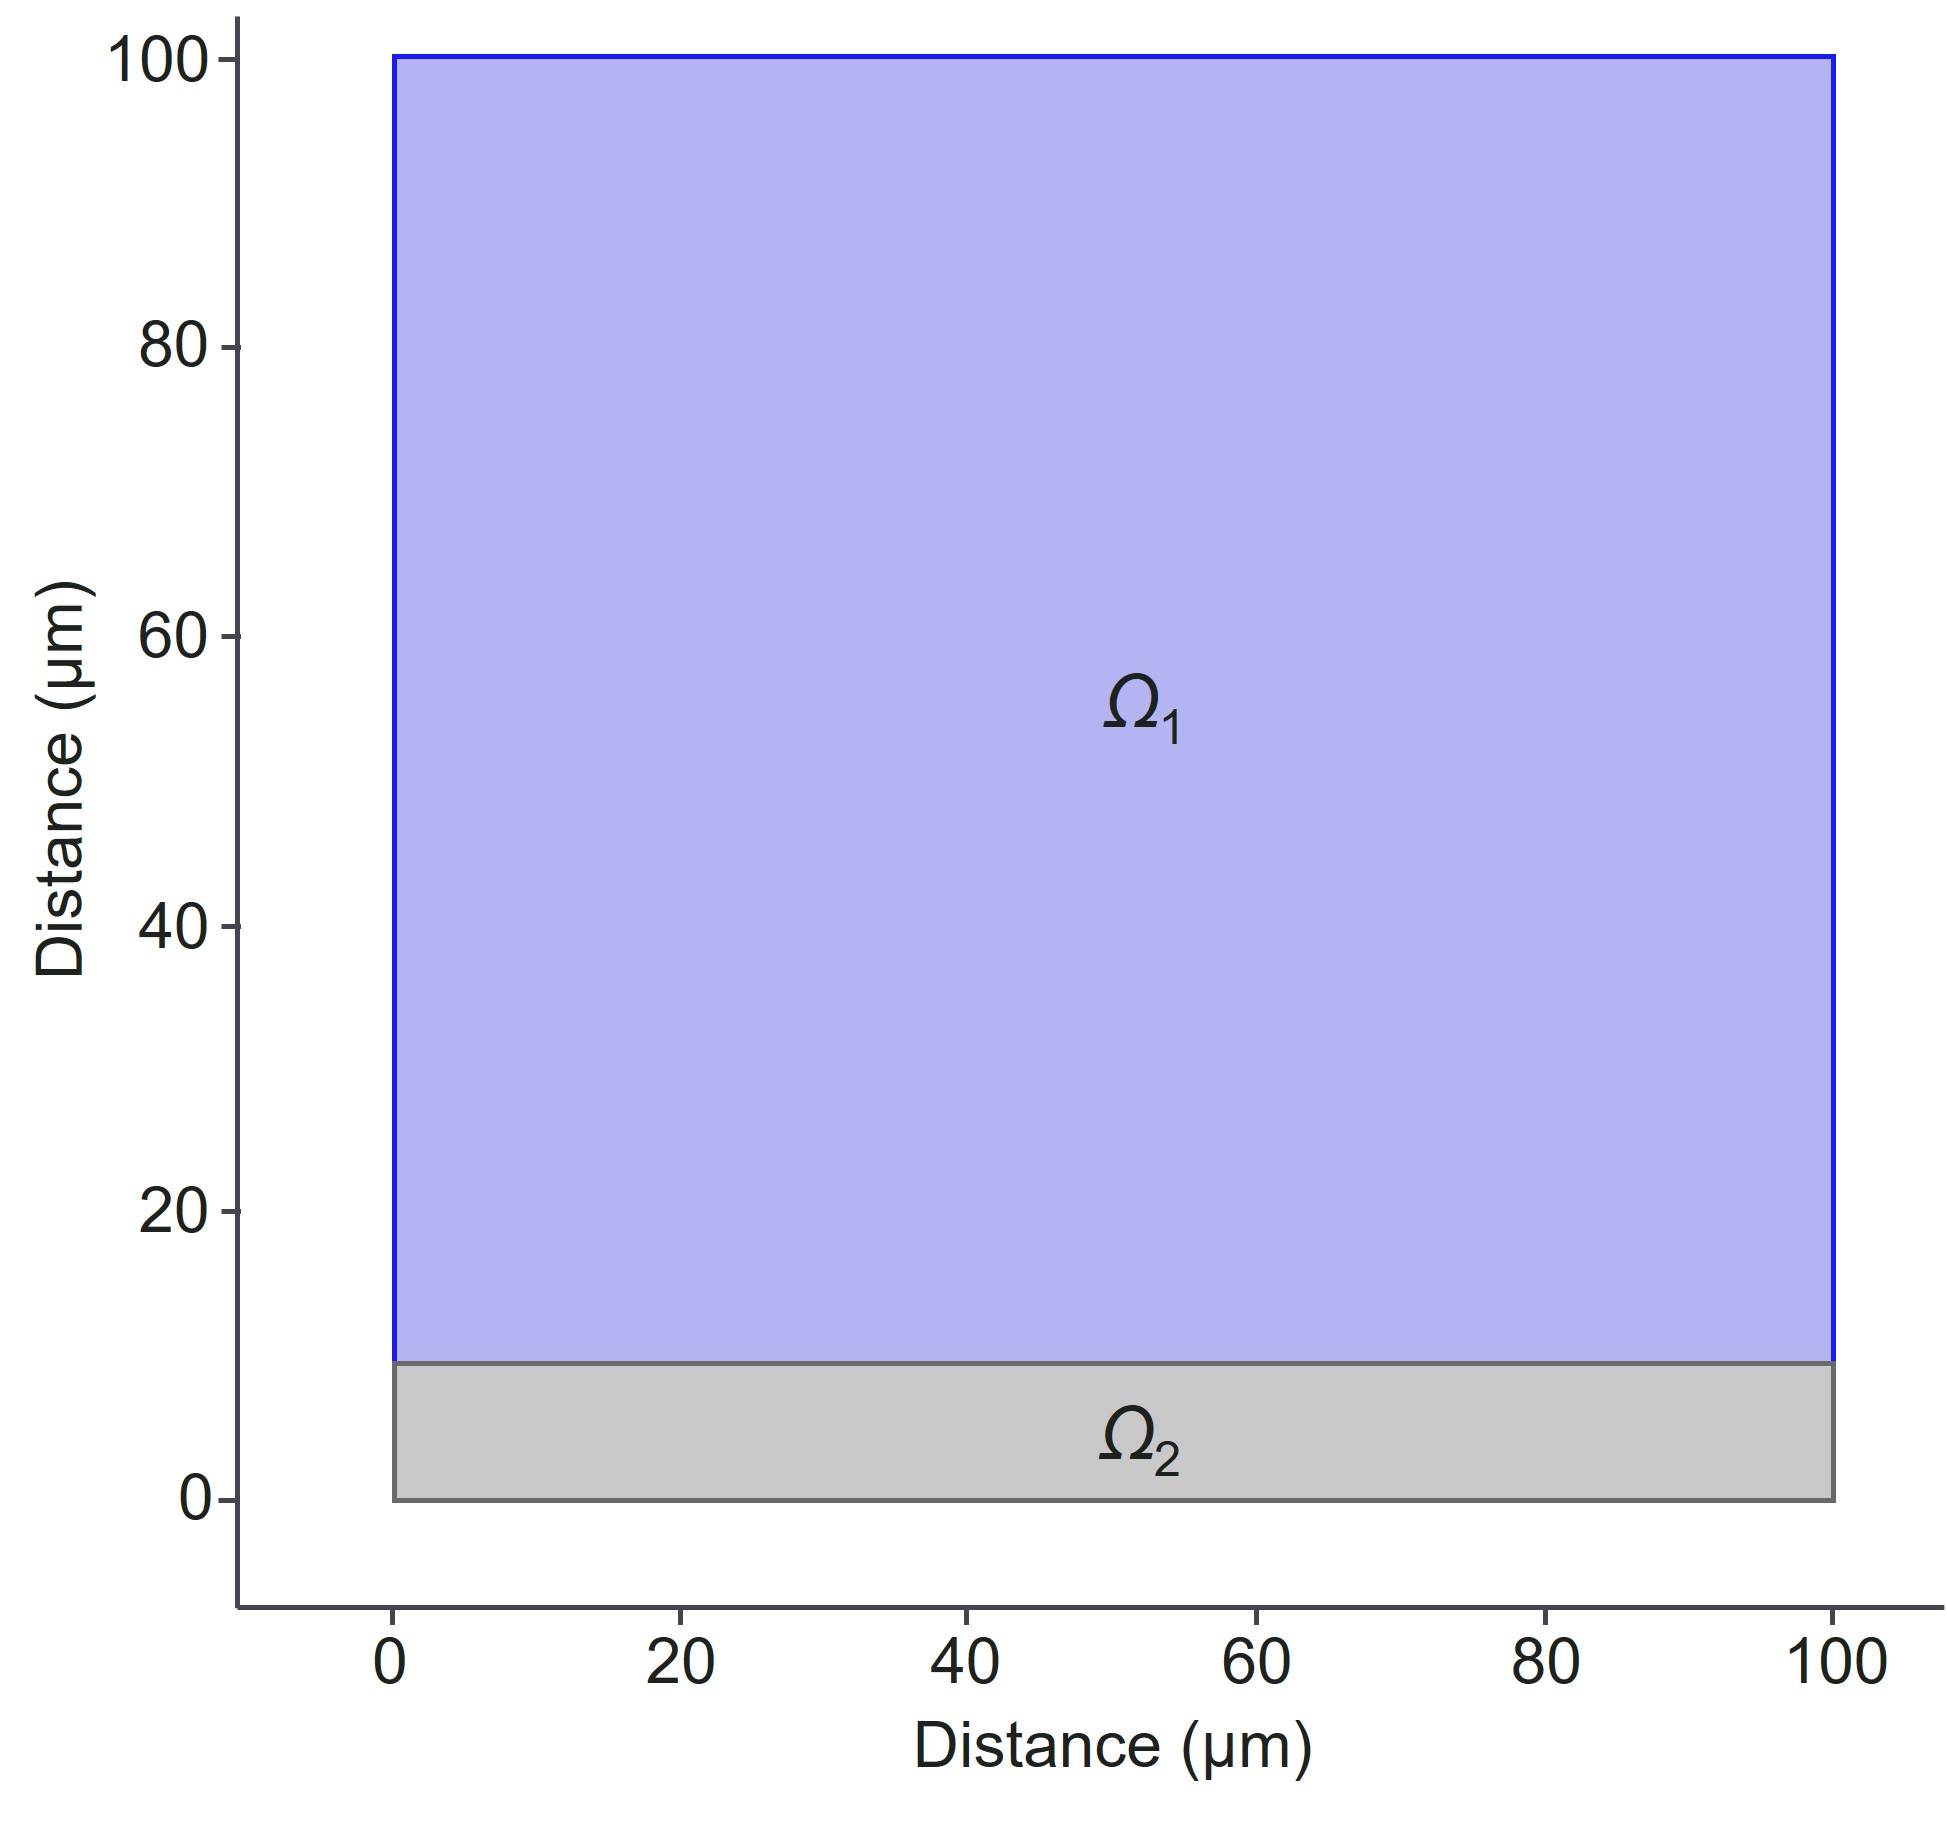


**Supplementary Figure 5. Calculation model using the computational fluid dynamics (CFD) method for ion transport upon nanochannels**.


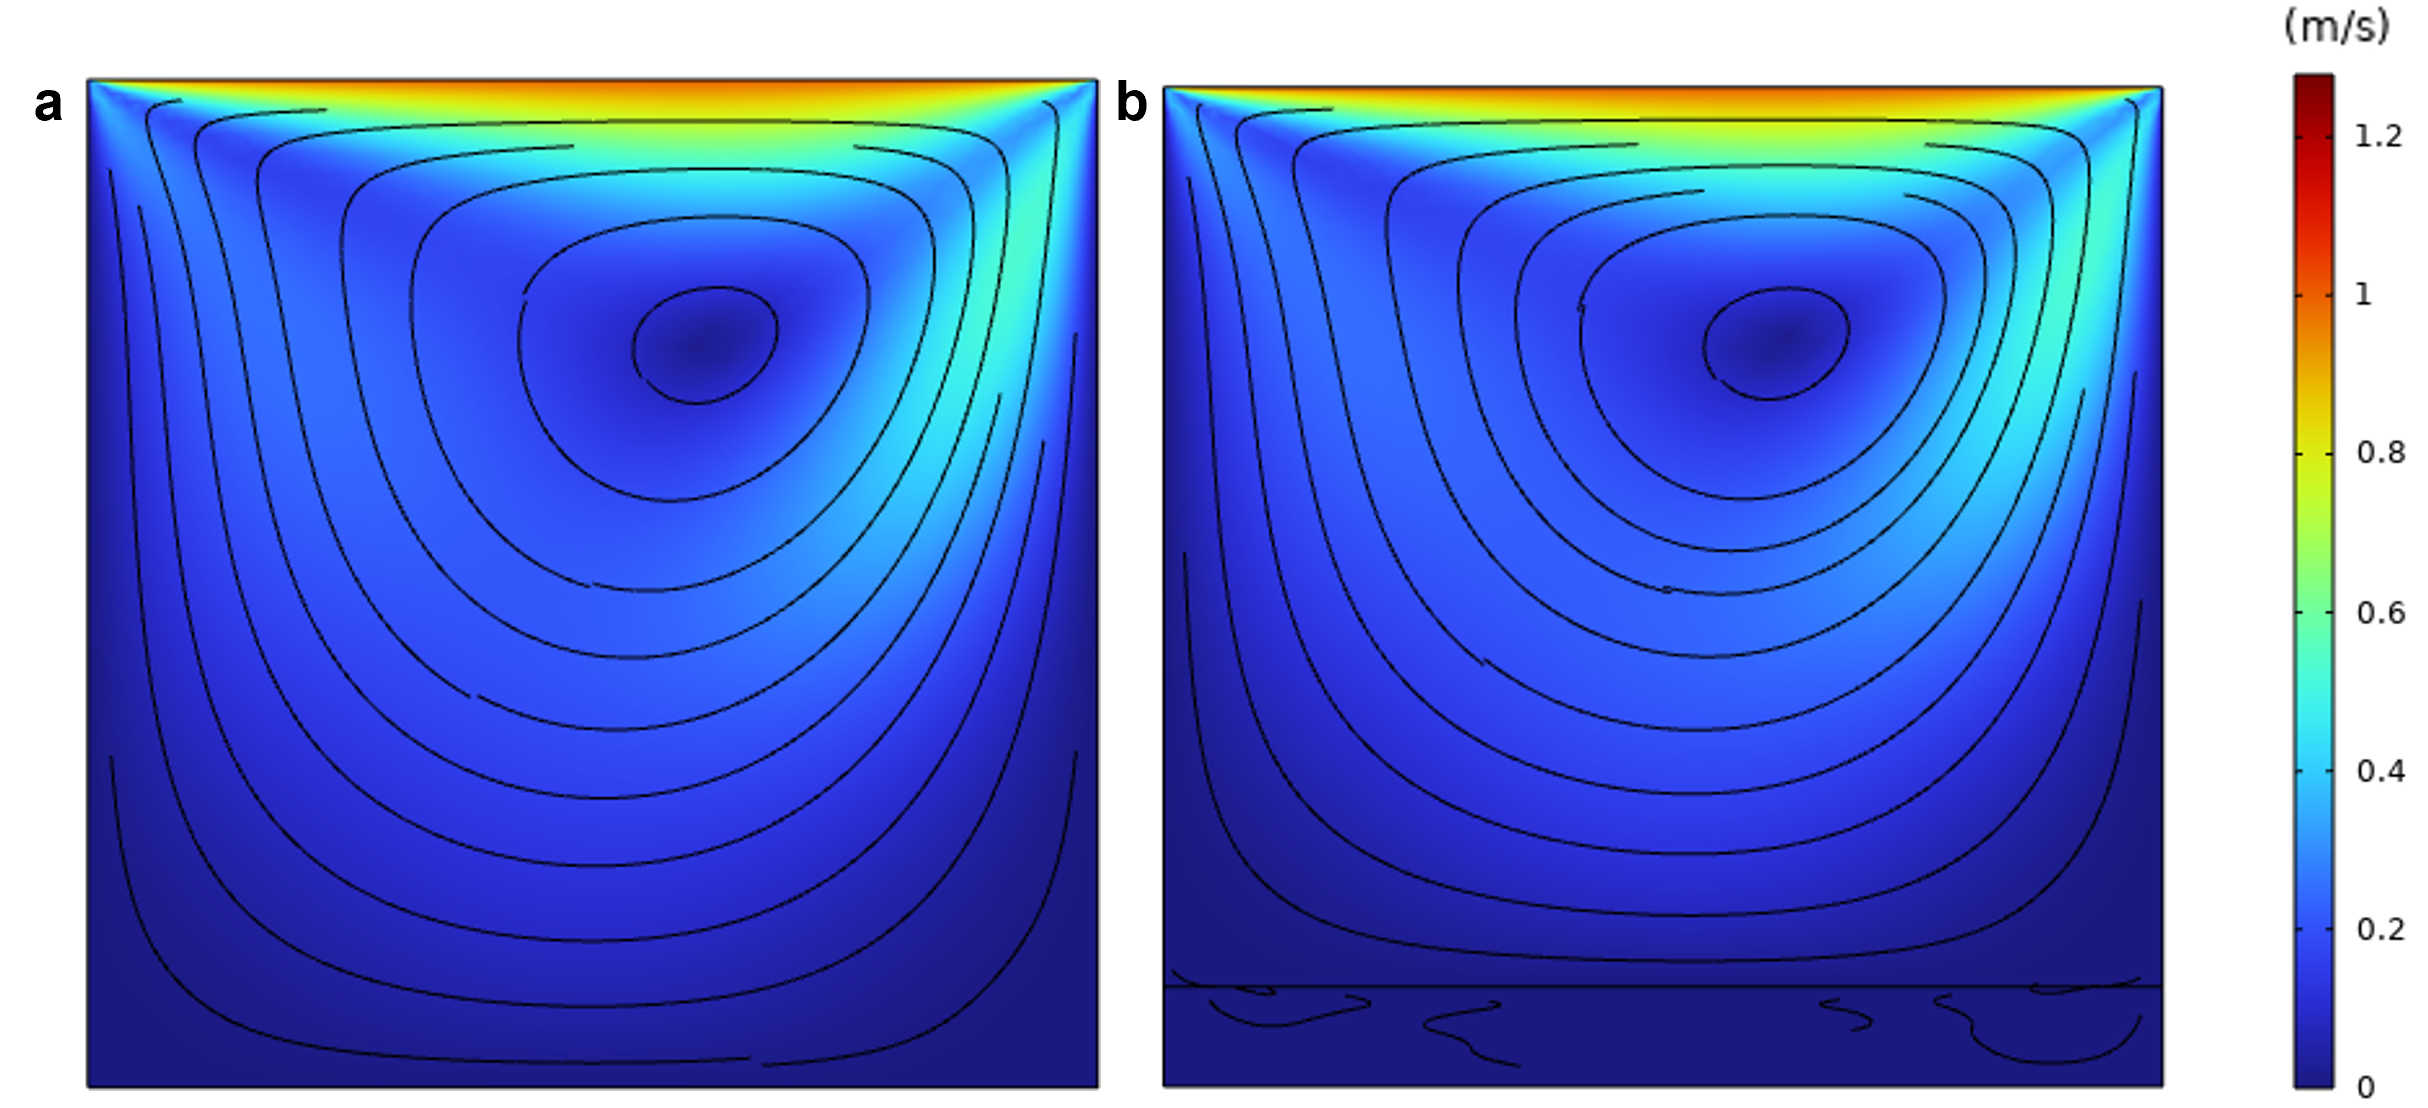


**Supplementary Figure 6. Ionic concentration fields upon bare Zn and coating. a,** Ionic concentration fields upon bare Zn. **b,** Ionic concentration fields upon coating.

In a 1010 μm two-dimensional region on the electrode surface, an artificial vortex (top-driven flow) was generated to simulate the smallest-scale turbulent motion of the solution at the electrode interface. Fluid motion within the porous coating adheres to Darcy's law, as depicted in the velocity field. The convection-diffusion equation is employed to depict the movement of Zn2+ and SO42- concentrations near the electrode surface. The diffusion rate of ions within the LAPONITE coating is influenced by the concentration of absorbed SO42-.


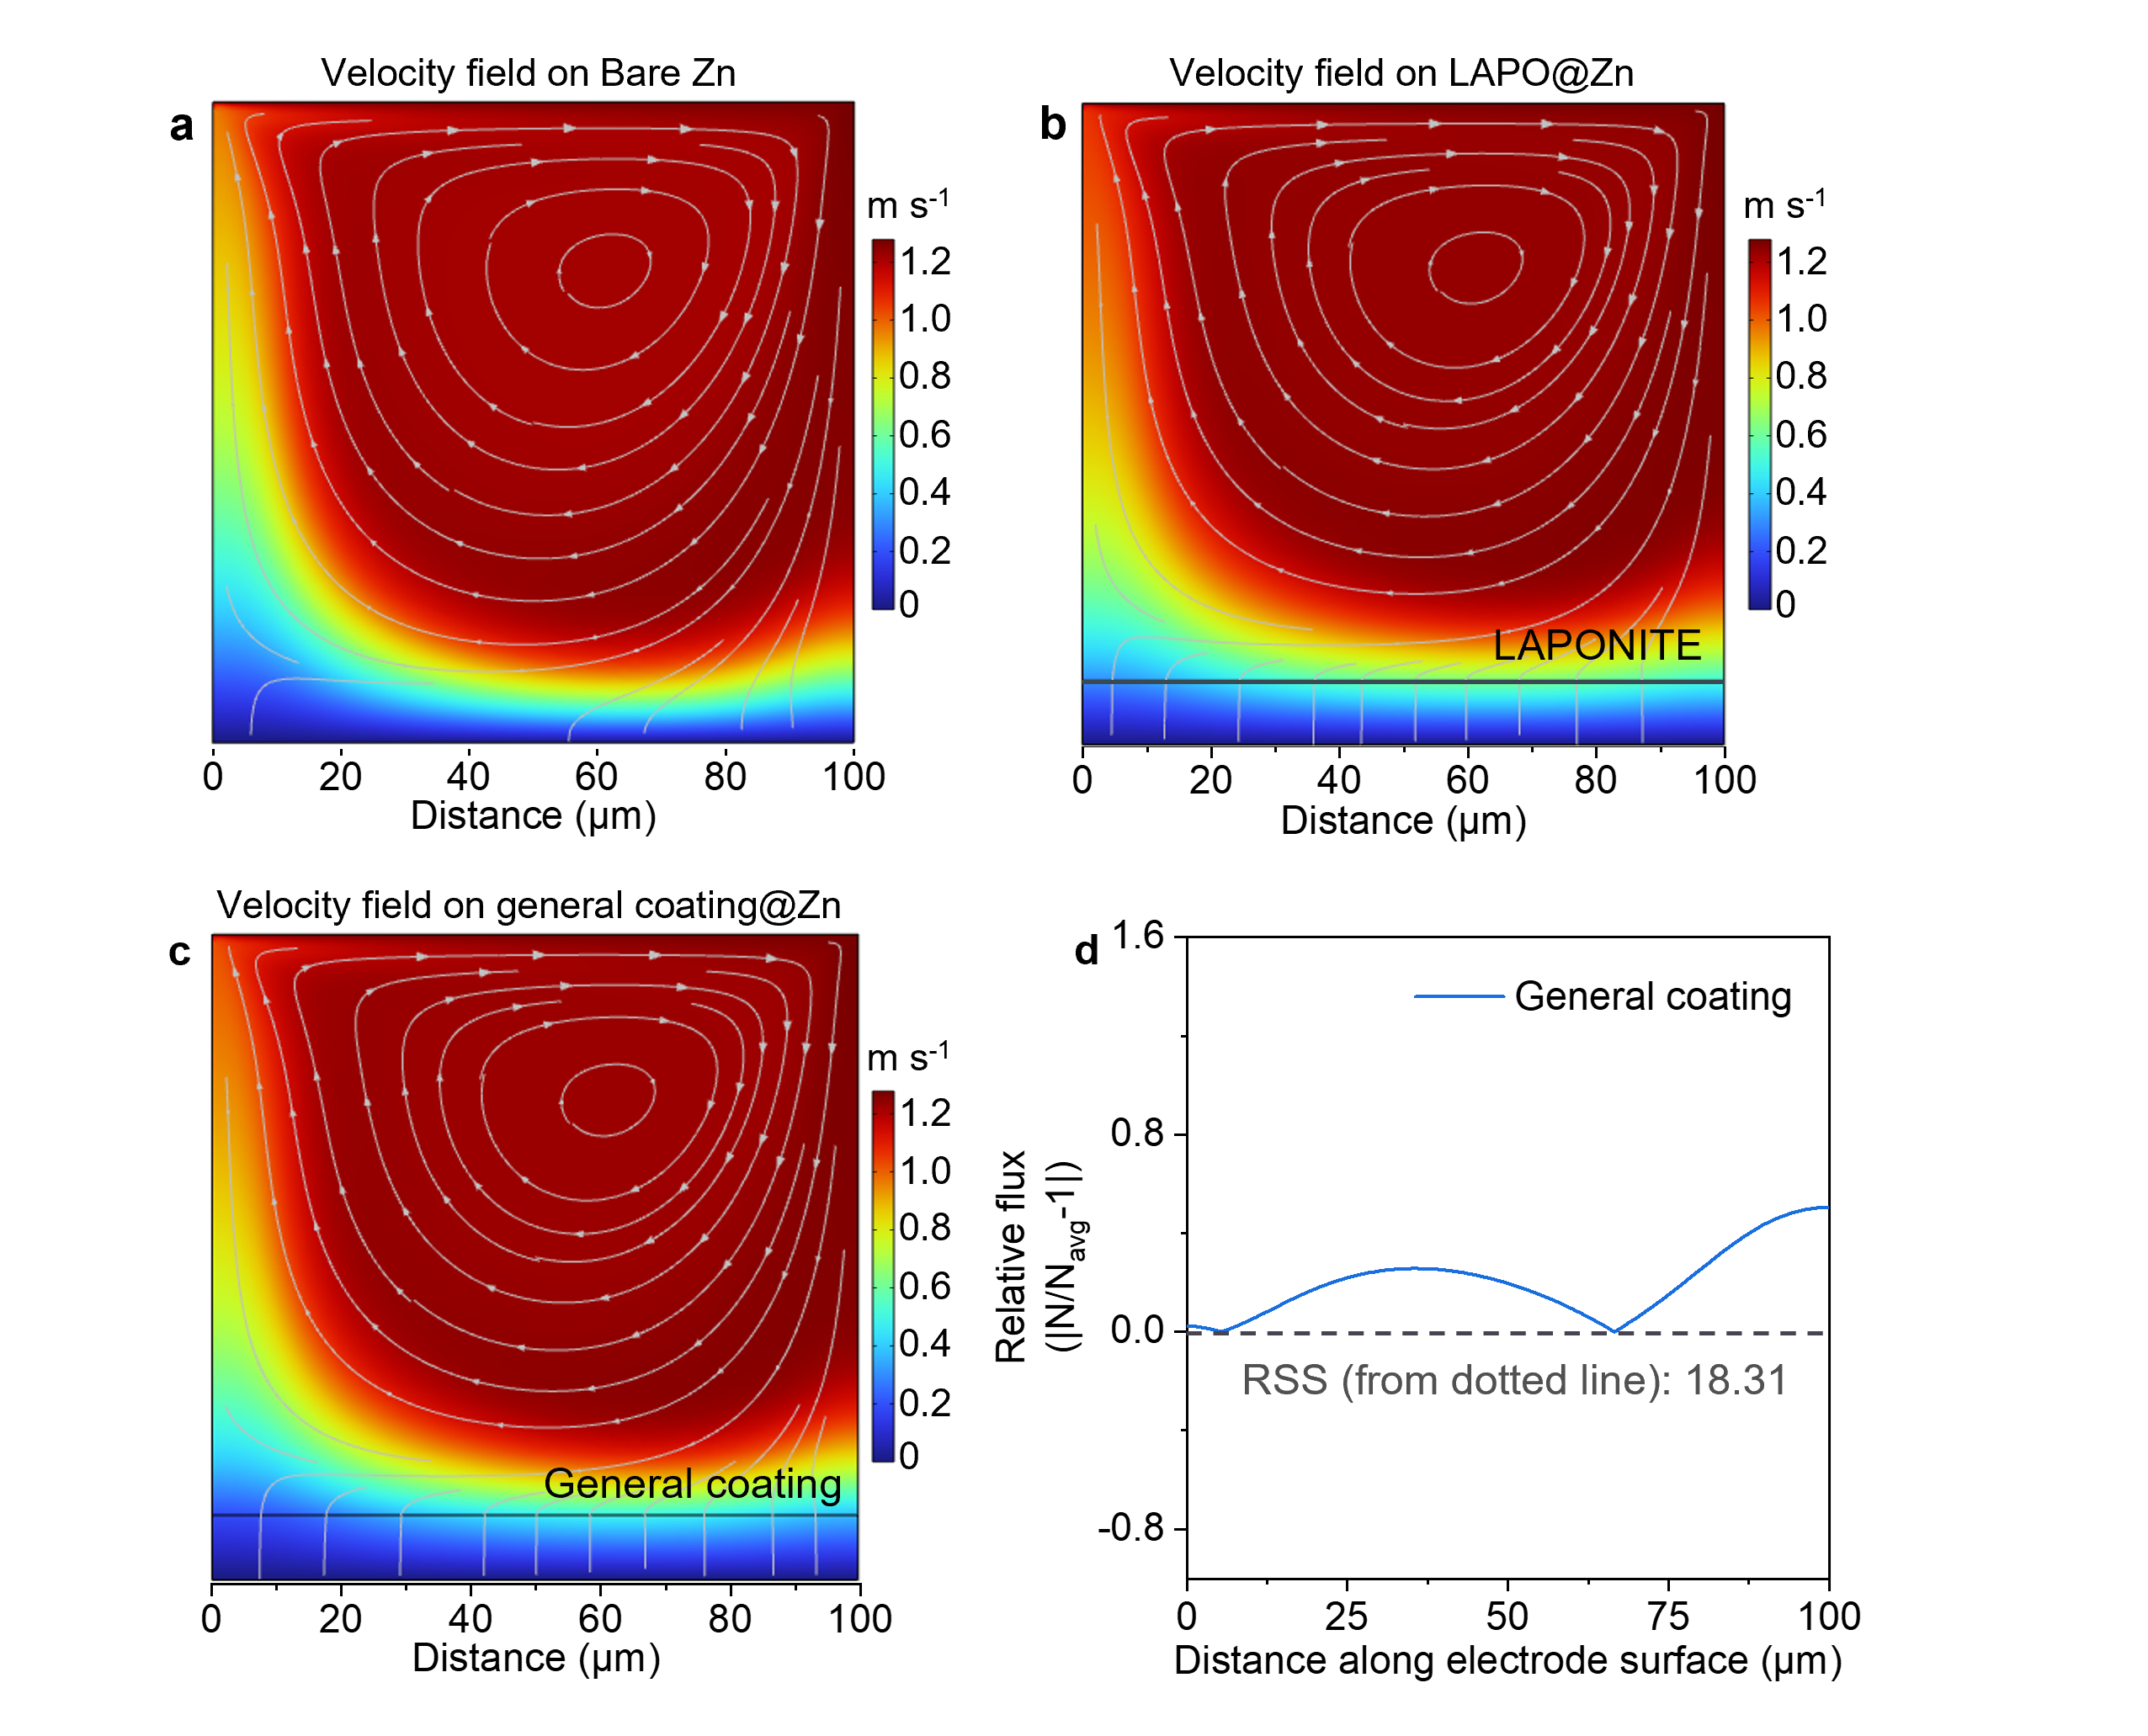


**Supplementary Figure 7. Velocity fields on different substrates. a-c,** Ionic concentration fields upon bare Zn (**a**), LAPO@Zn (**b**), and general coating@Zn (**c**). **d,** Zn2+ flux density on the general coating@Zn surface.

Nlocal and Naverage represent local and average Zn2+ flux densities, respectively. Deviation represents the residual sum of squares of individual data points relative to the dotted line. The general coating (like a conventional nanopore channeled coating) restricts ion diffusion, resulting in a more uniform distribution of metal ion concentration compared to bare Zn but less uniform than achieved with LAPO@Zn.


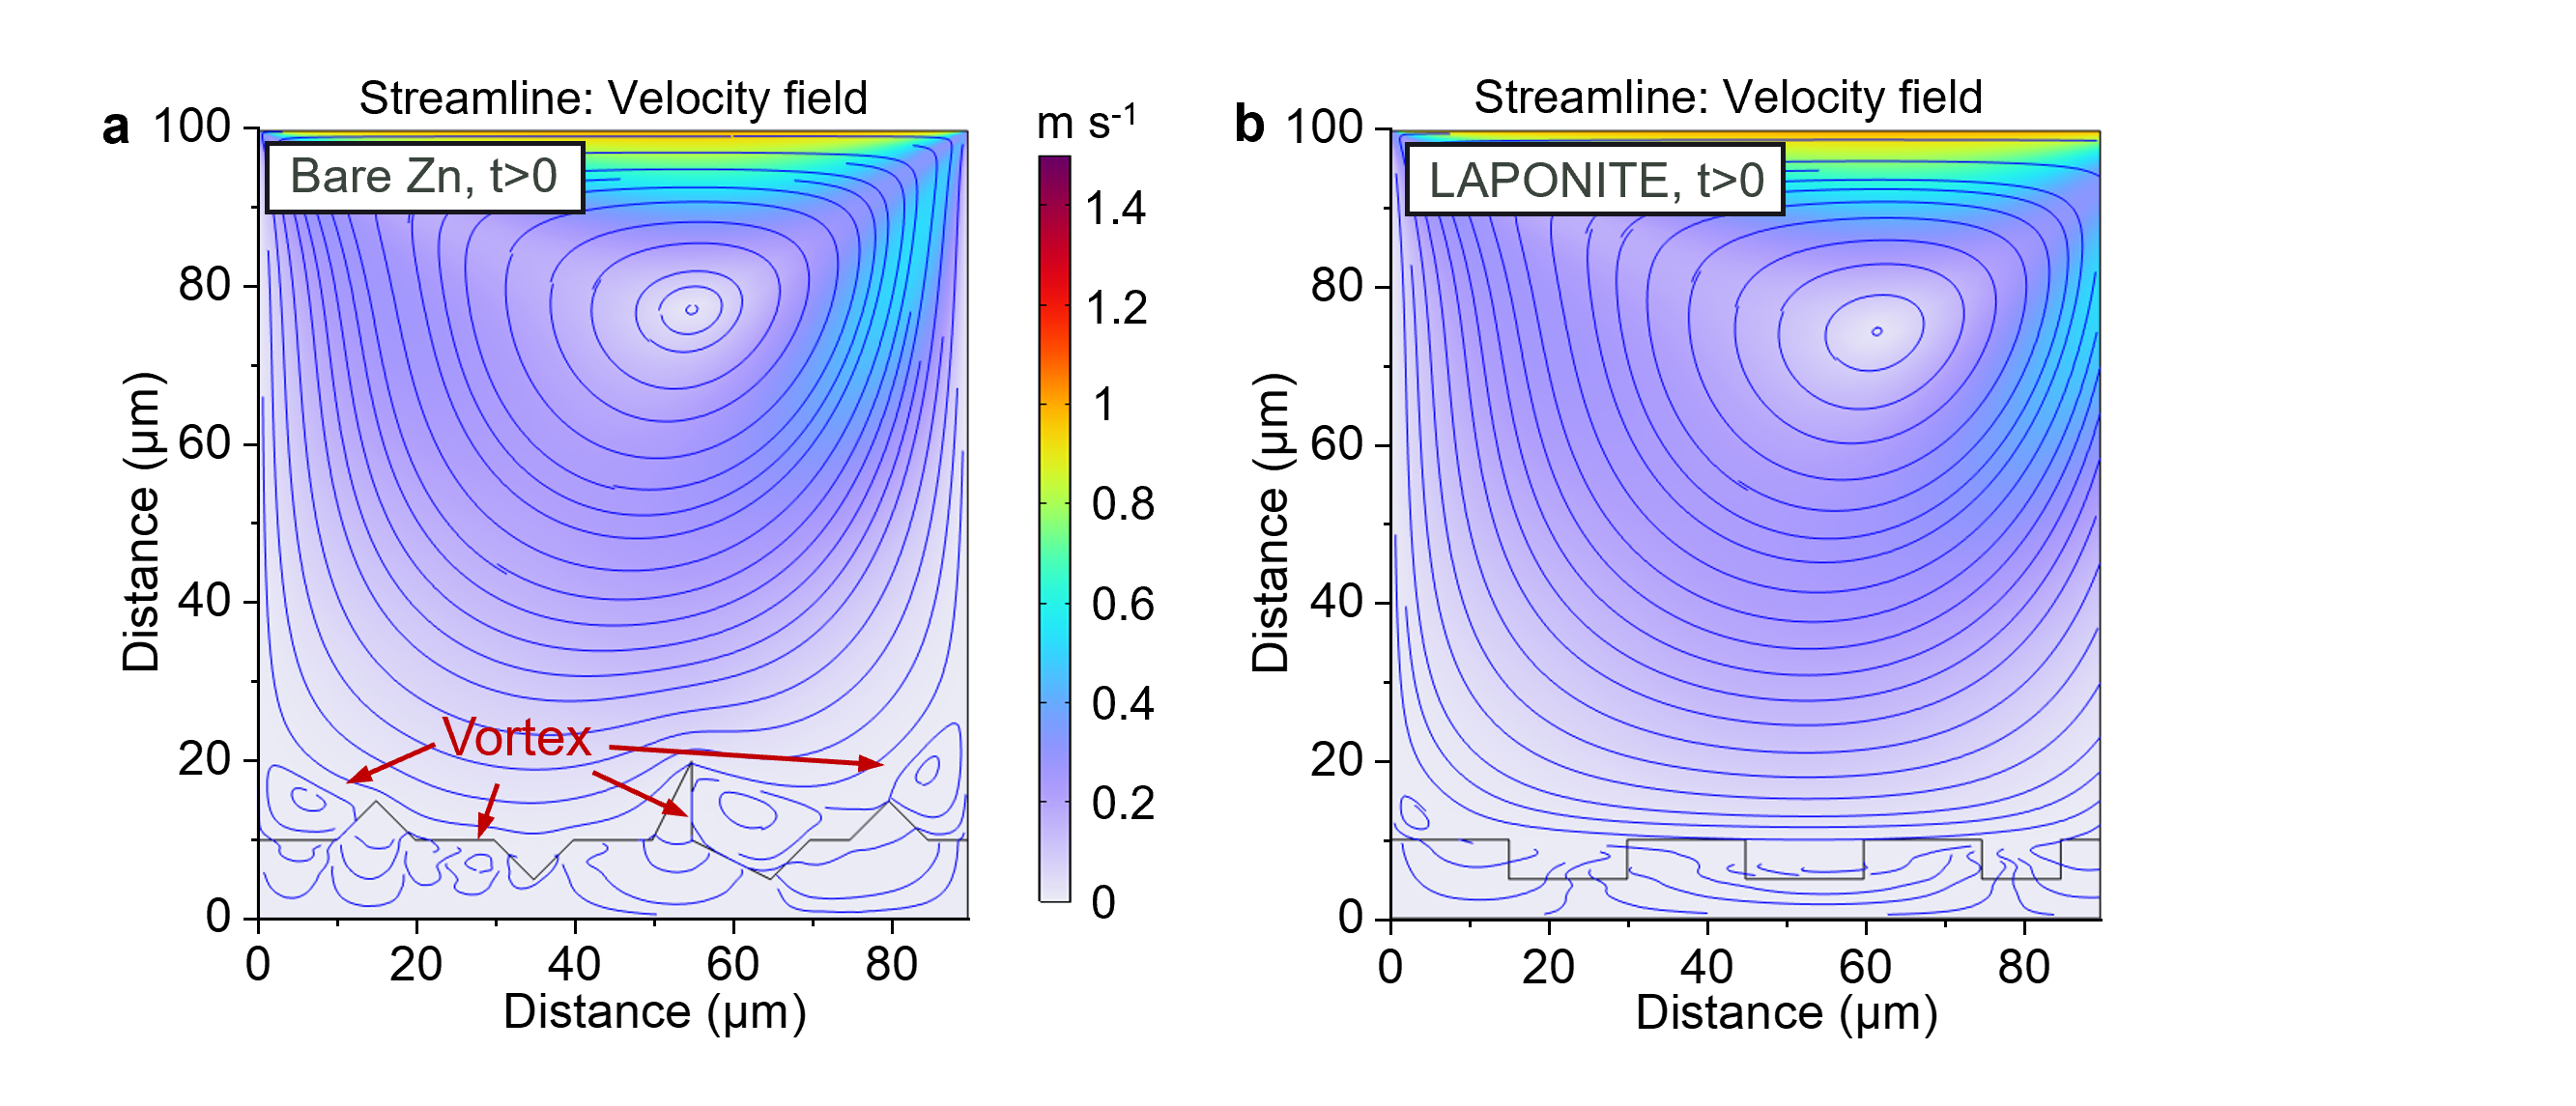


**Supplementary Figure 8. Velocity fields upon cycled electrodes. a,** Velocity field on bare Zn. **b,** Velocity field on LAPO@Zn.


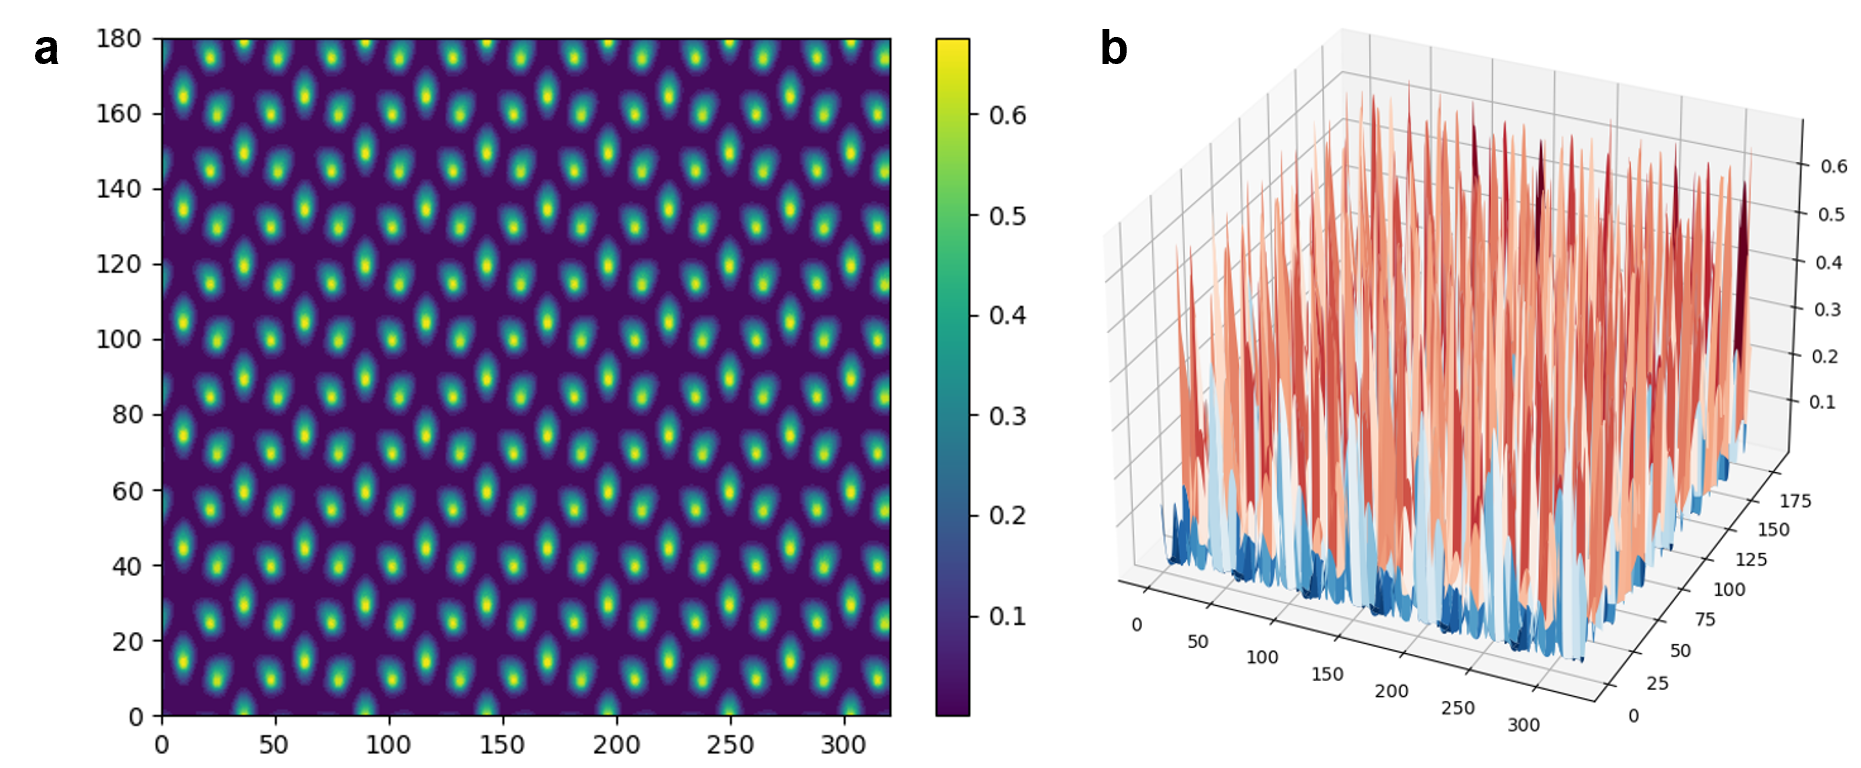


**Supplementary Figure 9. Electron distribution simulation.** **a,** Visualization of the electron localization function. **b,** Related potential of the surface of LAPONITE.


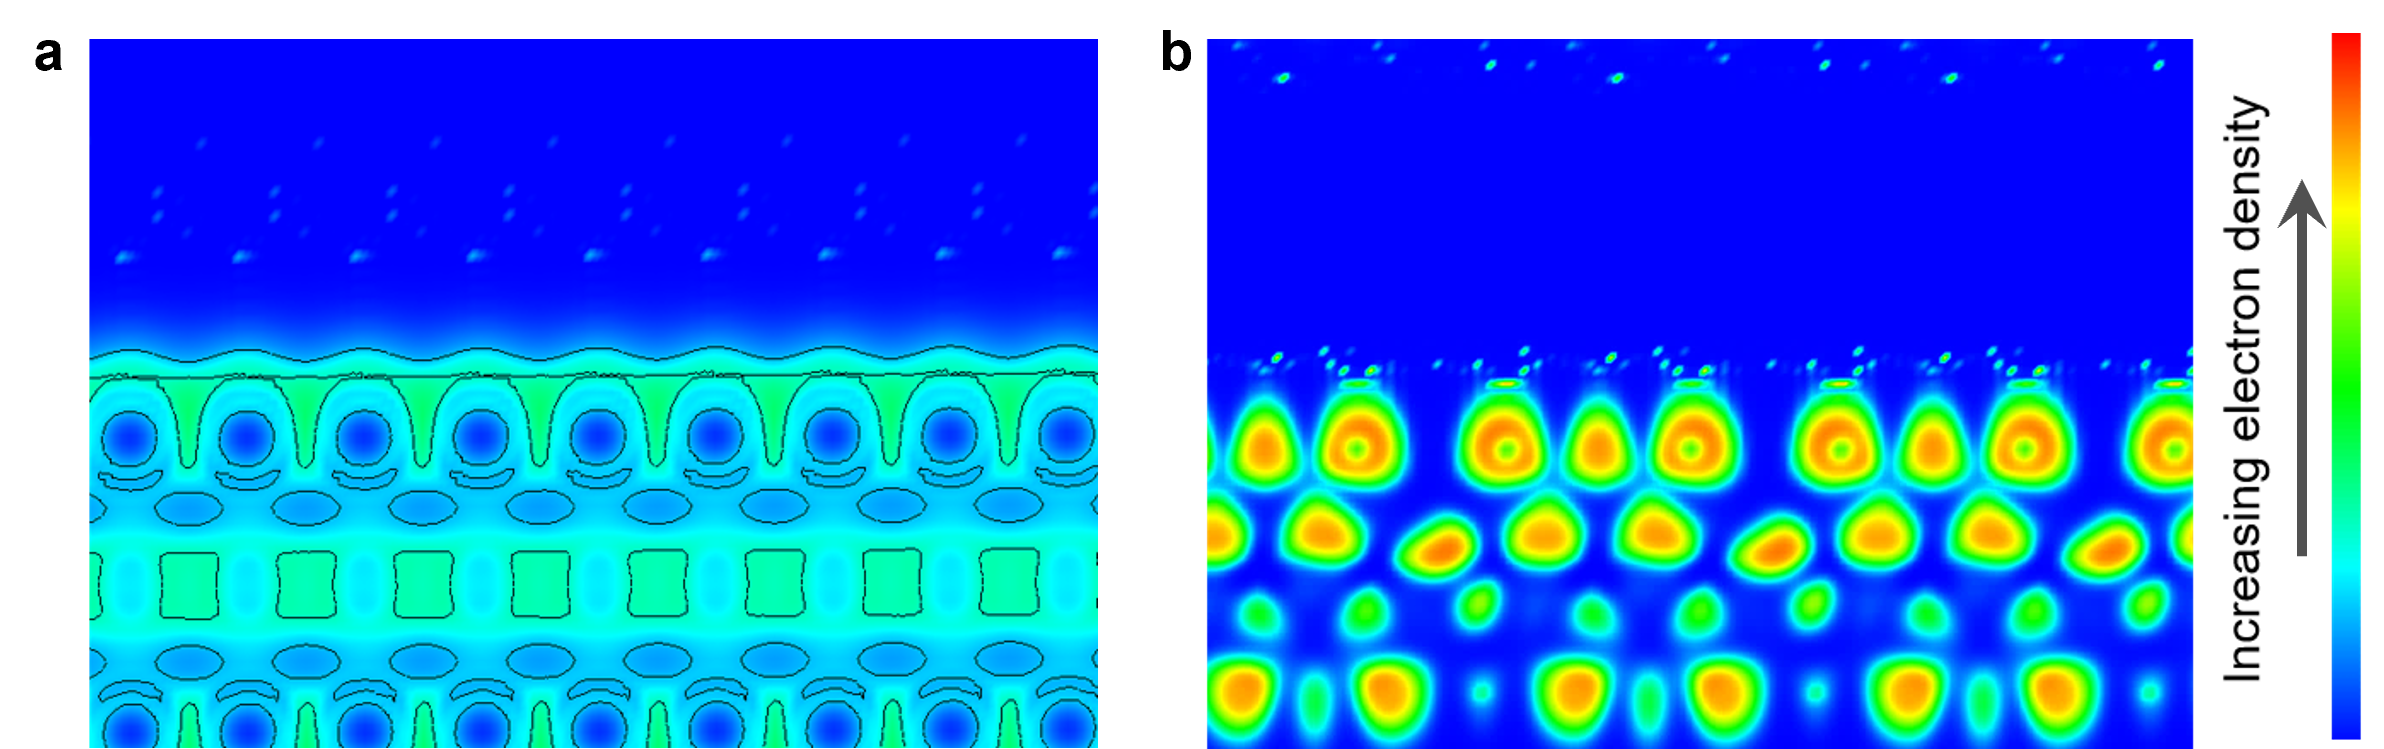


**Supplementary Figure 10. DFT simulation of the electron localization function. a,** On LAPONITE slabs. **b,** On Zn slabs.


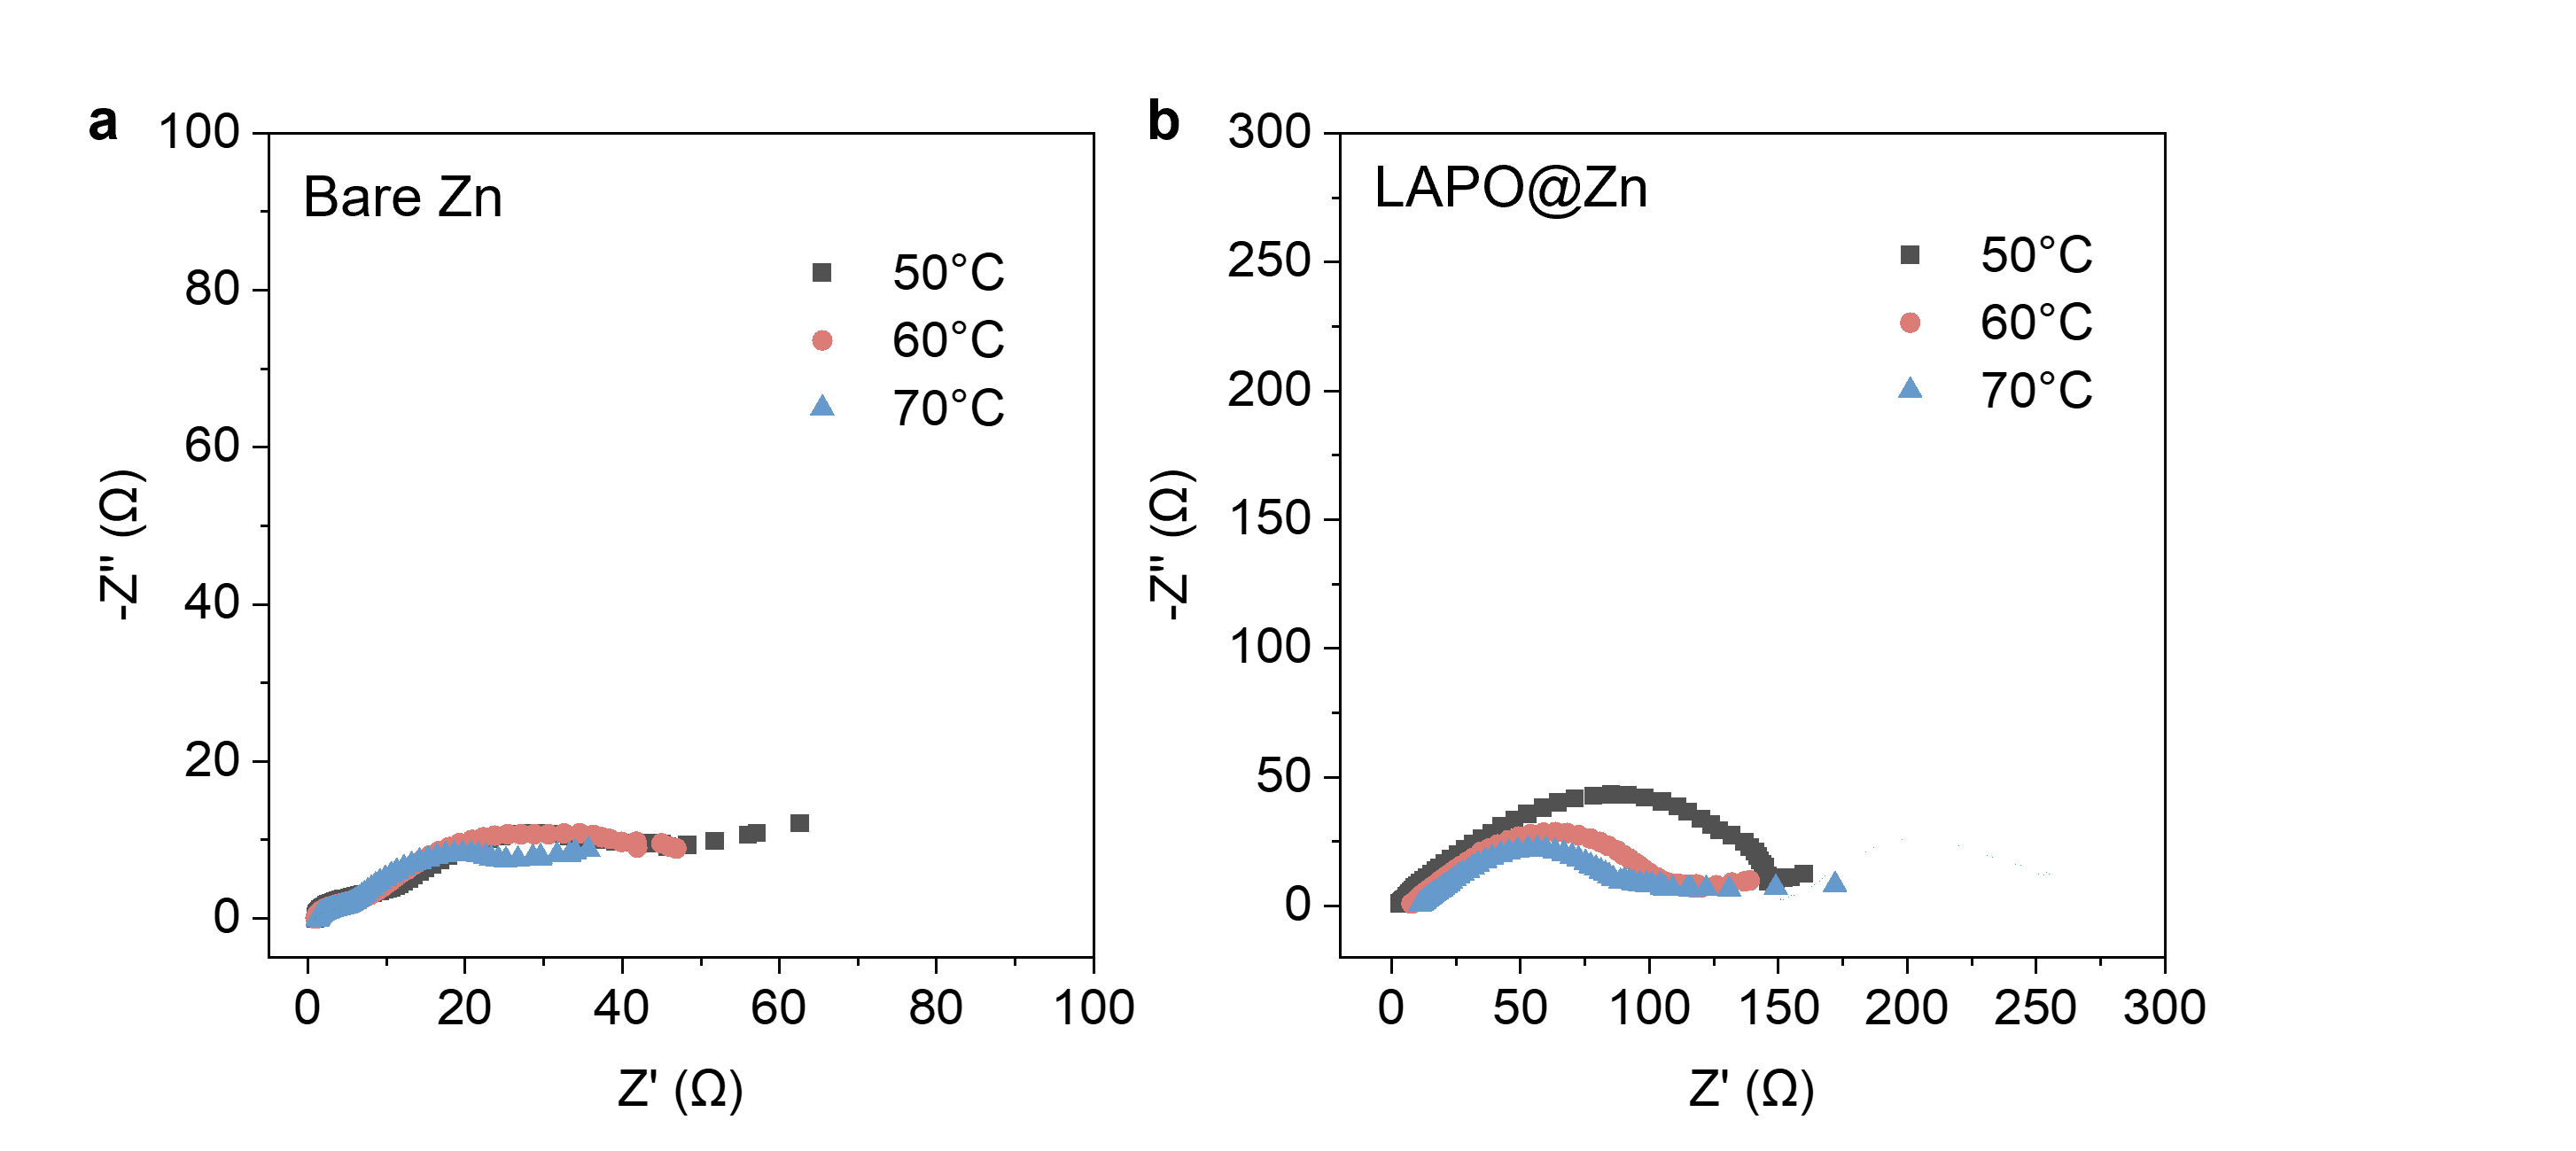


**Supplementary Figure 11. EIS spectra at different temperatures.** **a,** Bare Zn symmetric cells. **b,** LAPO@Zn symmetric cells.


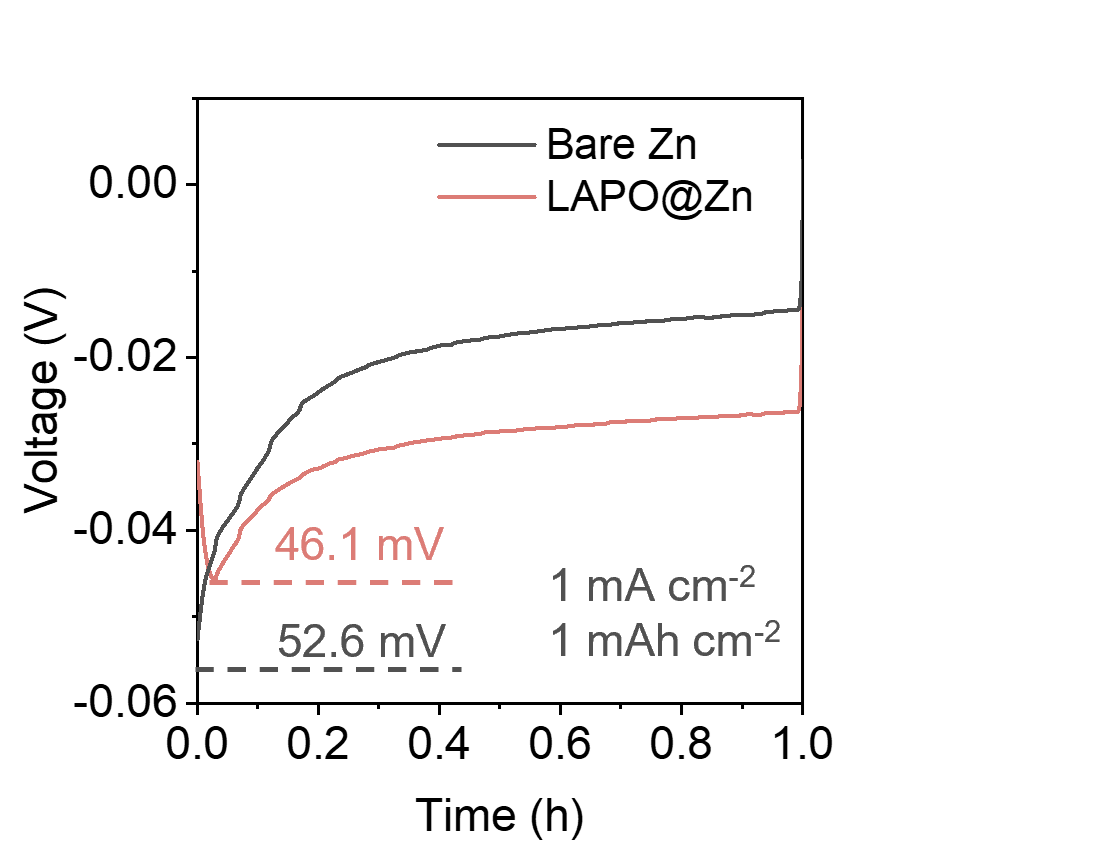


**Supplementary Figure 12. First-cycle discharge profiles of Zn||Zn symmetric cells using bare Zn and LAPO@Zn electrodes**.


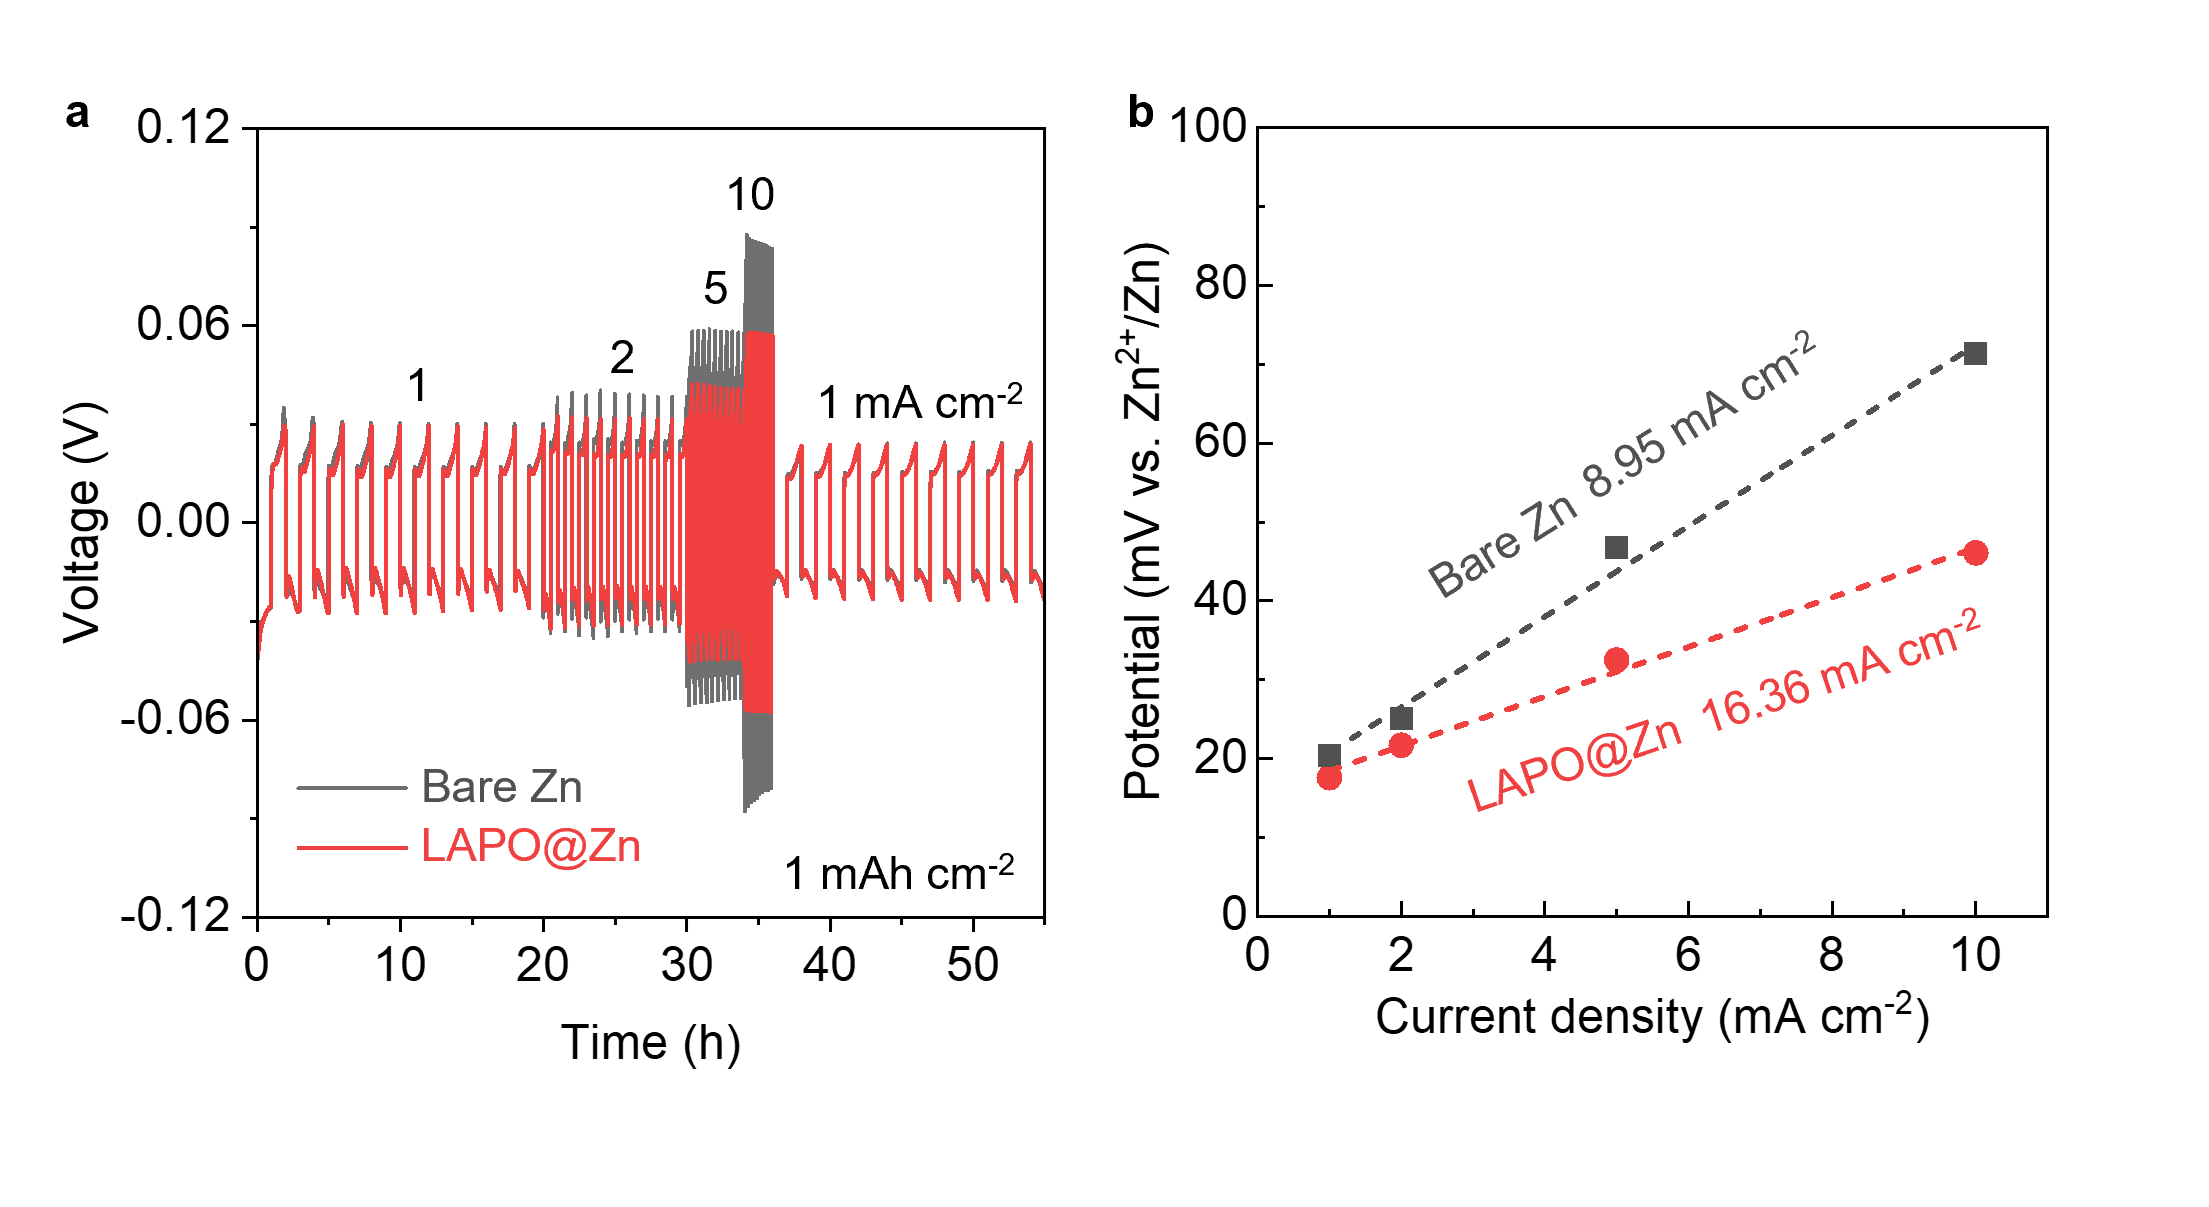


**Supplementary Figure 13. Rate performance based on different electrodes. a,** Plating/stripping curves of bare Zn and LAPO@Zn symmetric cells at 1 mA cm-2, 2 mA cm-2, 5 mA cm-2, 10 mA cm-2 with a fixed capacity of 1 mAh cm-2. **b,** Exchange current density calculated from rate performance of Zn||Zn symmetric cells in (**a**).

This analysis allowed us to determine the exchange current densities following the equation provided below:

(2)

where *i* is the current density, *i*0 is the exchange current density, *F* is the Faraday constant, *R* is the gas constant, *T* is the absolute temperature, and *η* is the overpotential.


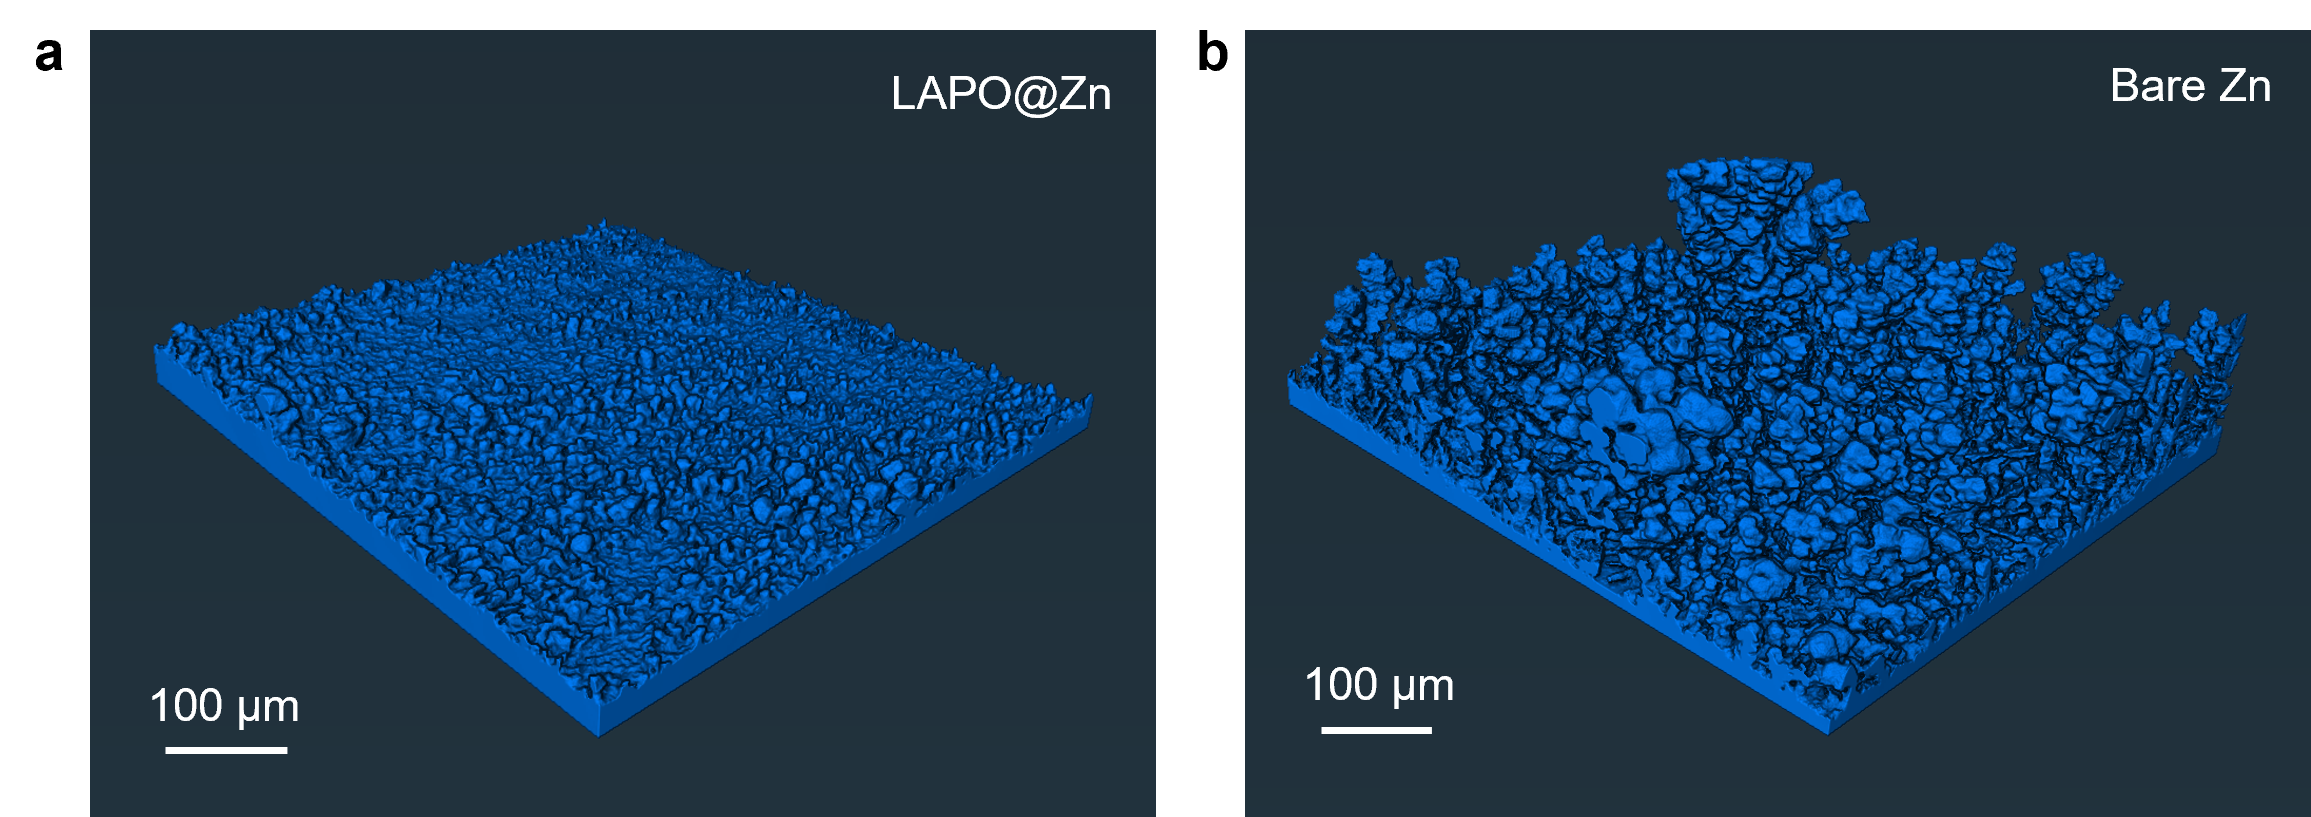


**Supplementary Figure 14. 3D rendered Zn images** **after in-situ X-CT testing of** LAPO@Zn (**a**) and Bare Zn (**b**).


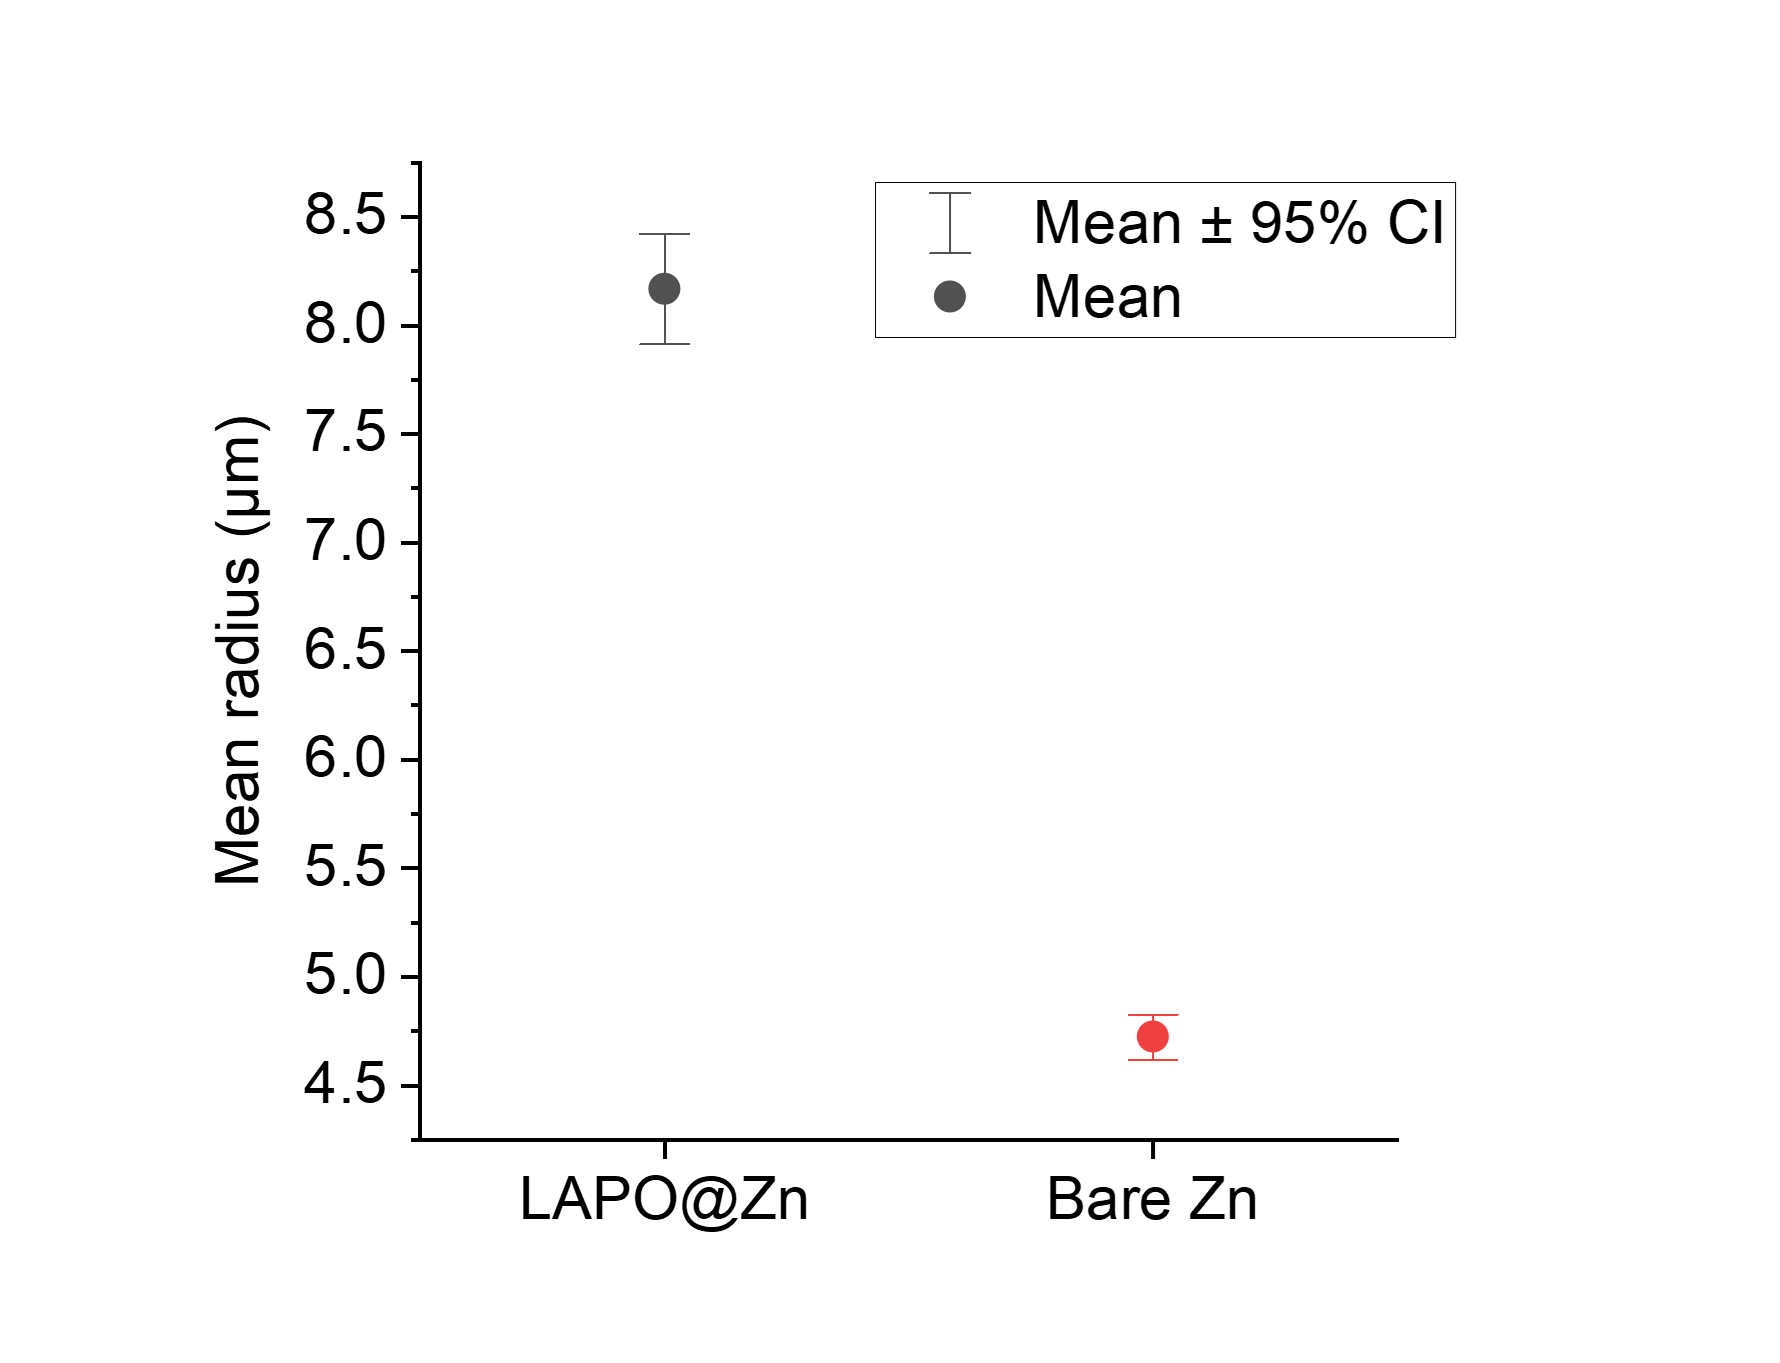


**Supplementary Figure 15. Statistical distribution of mean radius ranges for segmented Zn in LAPO@Zn and bare Zn after in-situ X-ray CT investigation**.


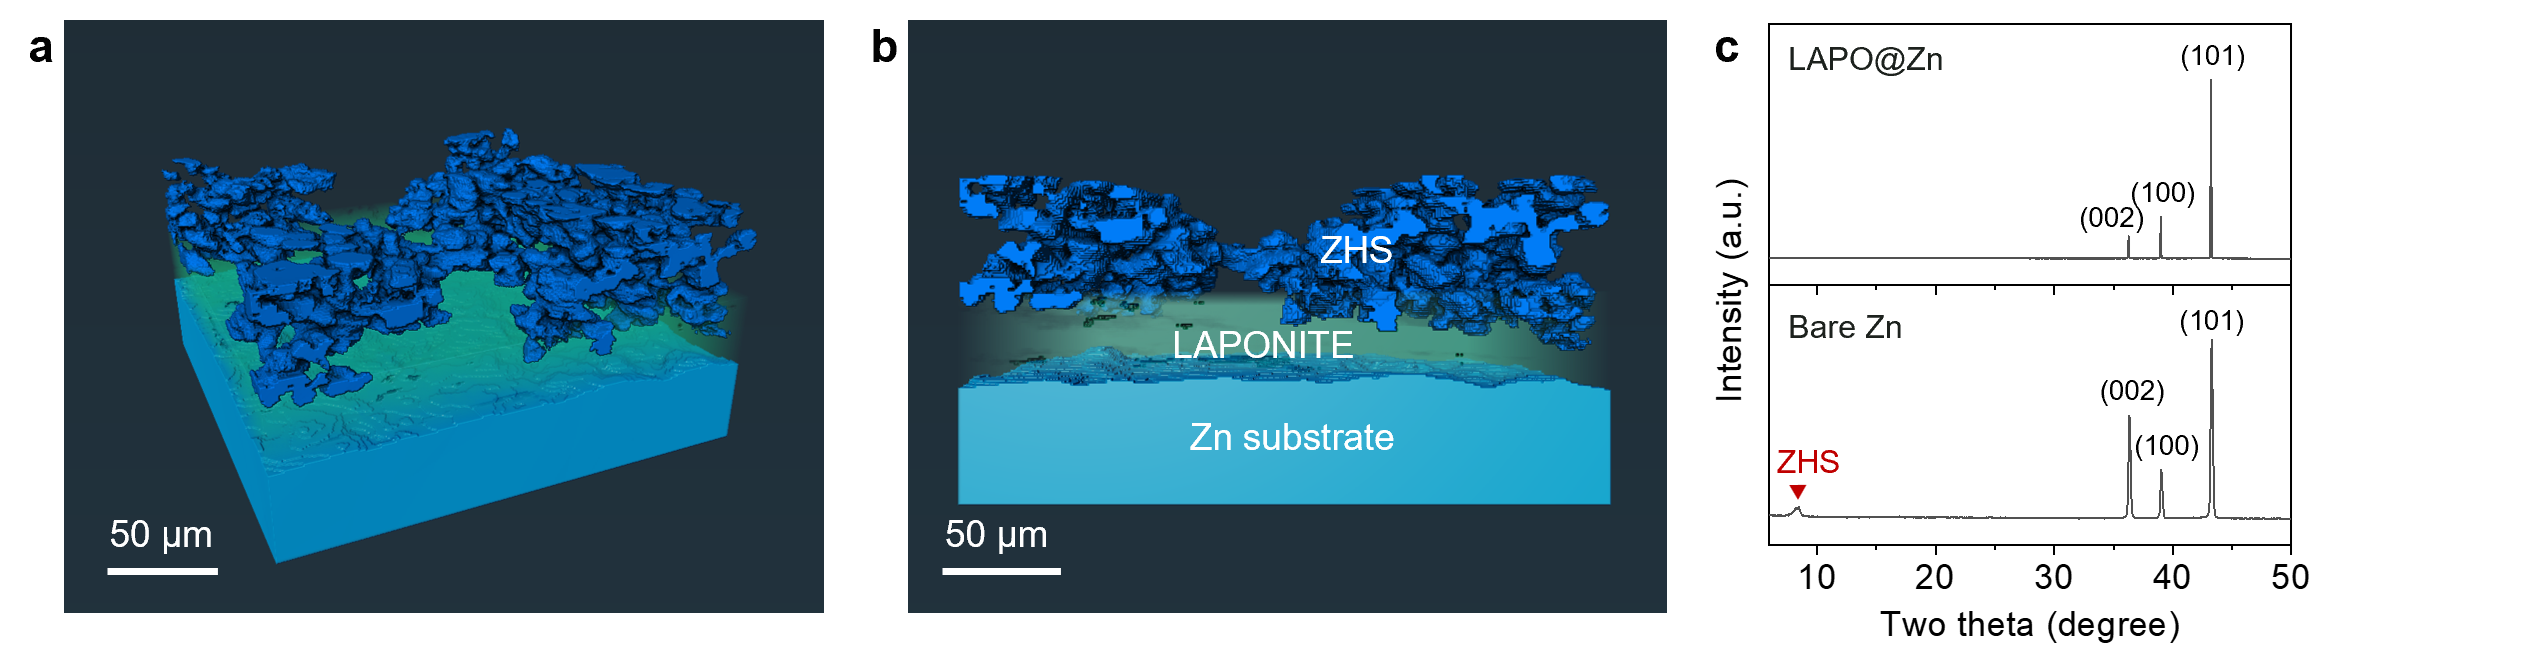


**Supplementary Figure 16.** **Zinc hydroxide sulfate (ZHS) detection from in-situ X-ray CT investigation and XRD pattern.** **a,b,** Overlapped segmentation images of LAPO@Zn after in-situ X-CT testing. **c,** GIXRD patterns of bare Zn and LAPO@Zn after cycling.


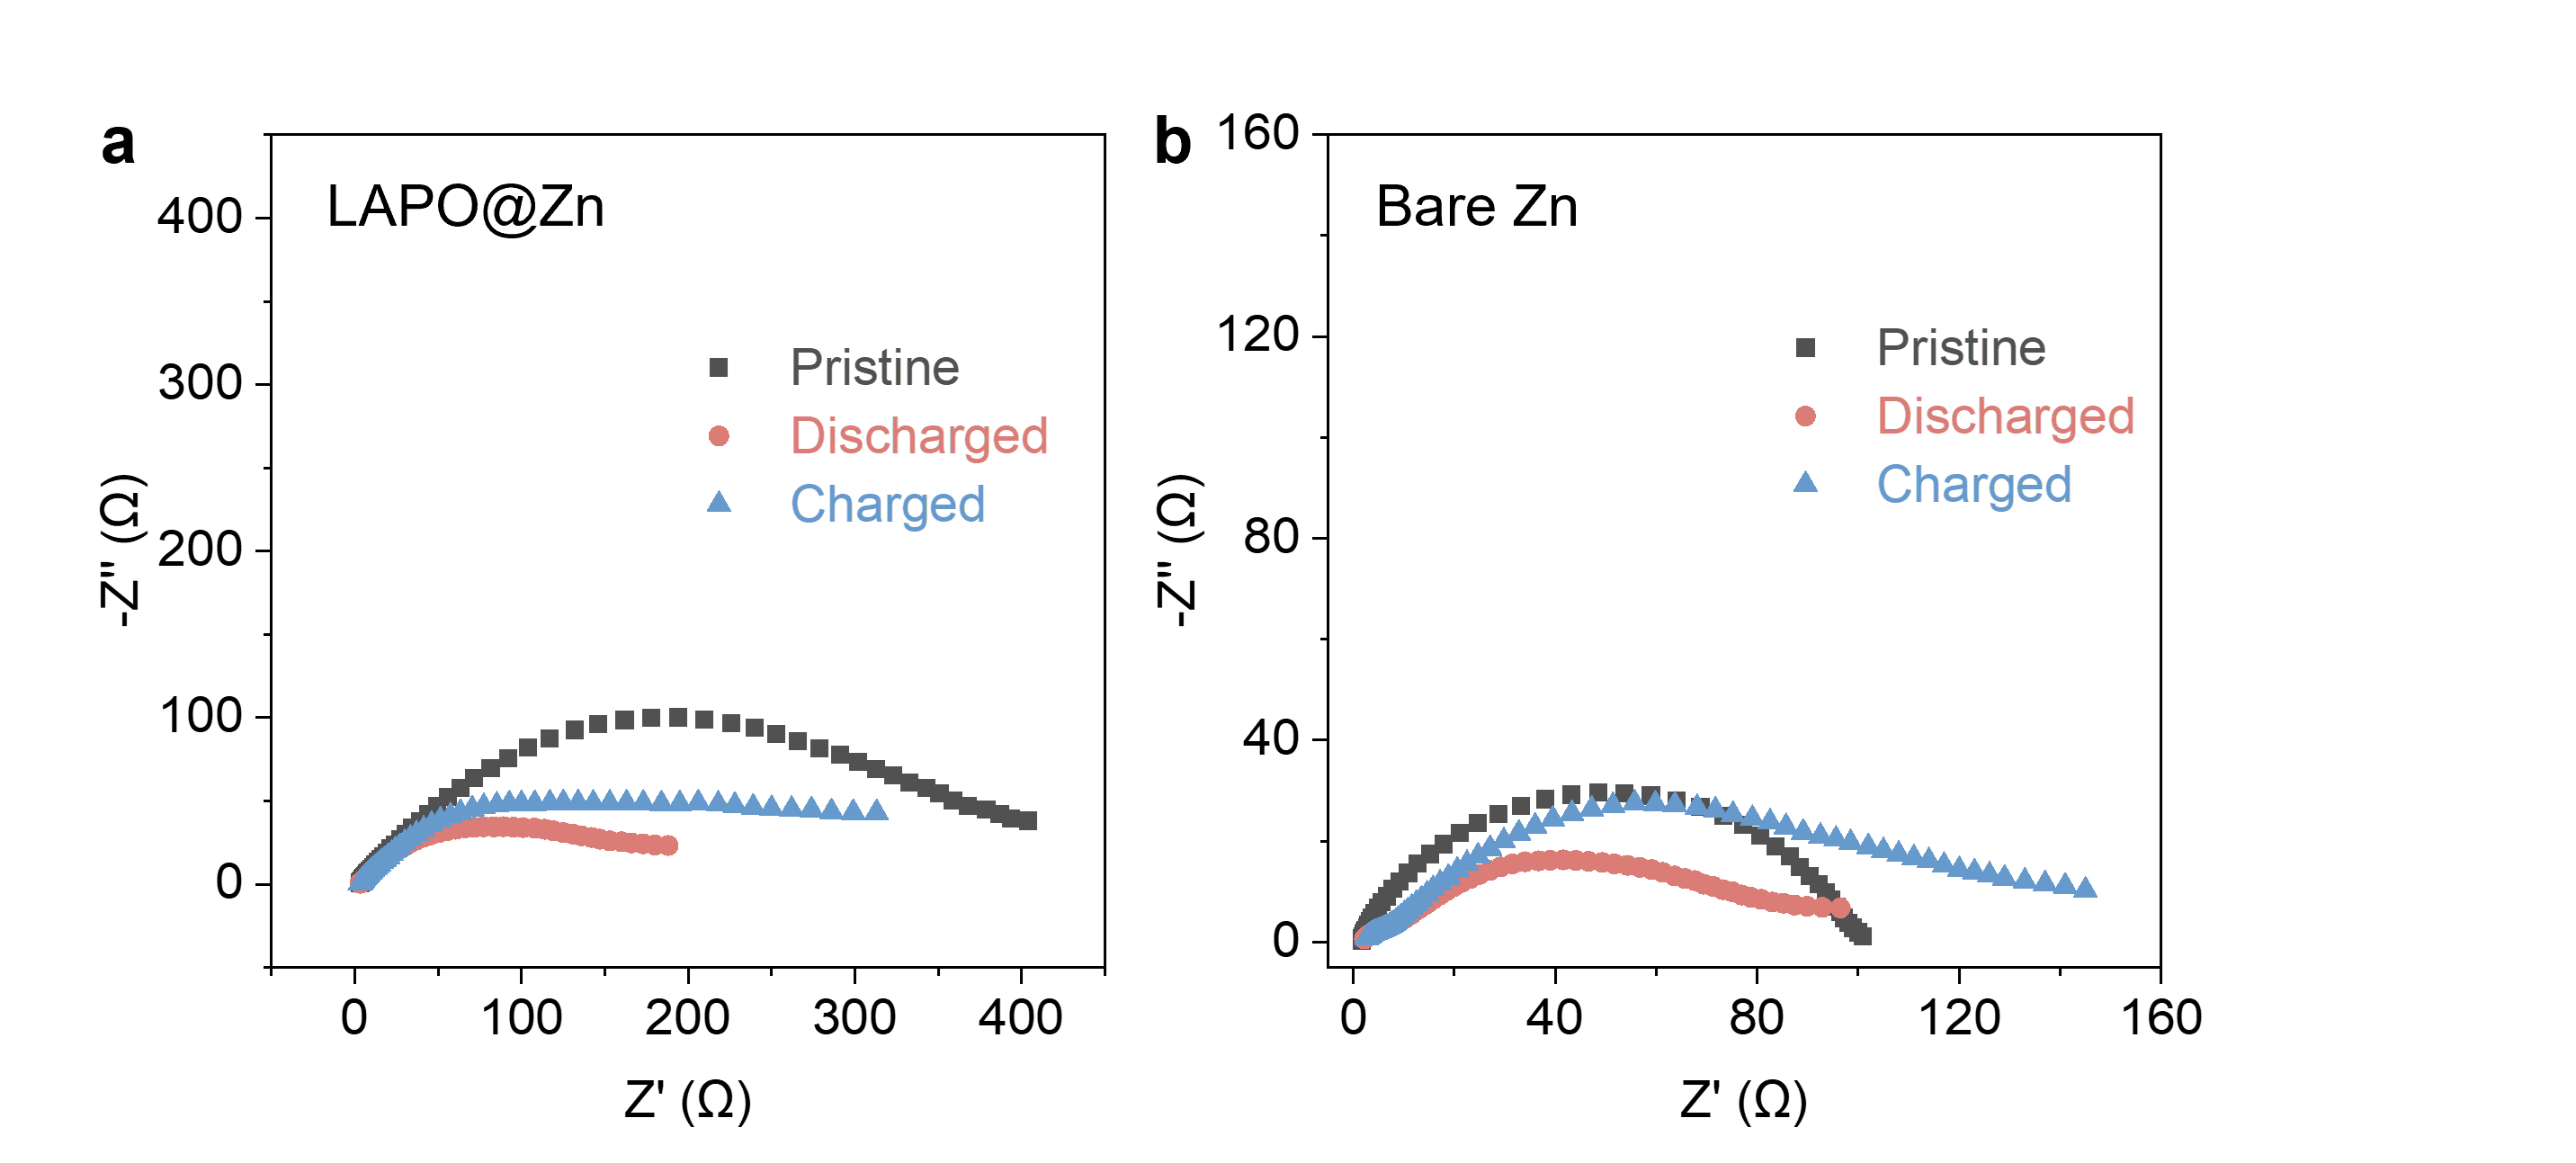


**Supplementary Figure 17. In-situ EIS spectra.** These spectra were recorded at pristine, discharged, and charged states during the first cycle, including LAPO@Zn (**a**) and bare Zn (**b**) symmetric cells.


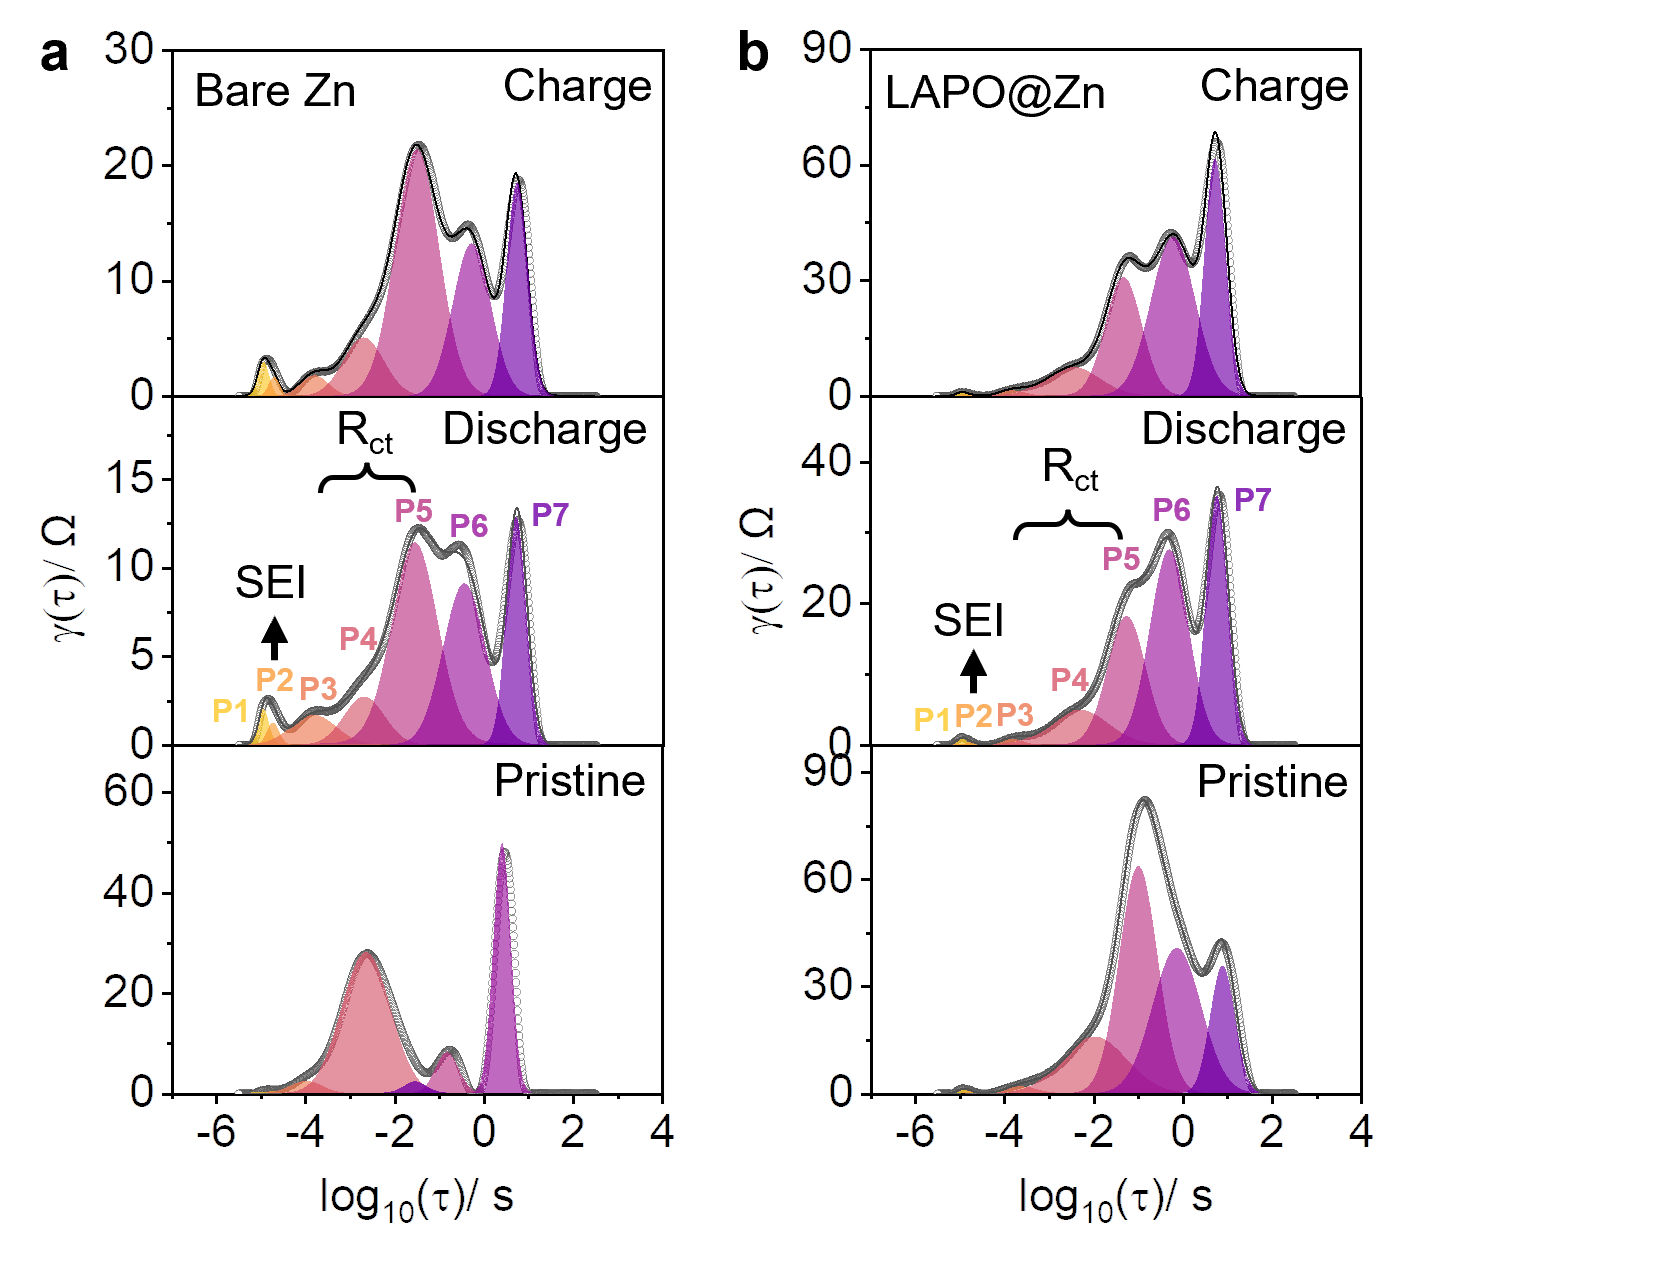


**Supplementary Figure 18. The distribution of relaxation times (DRT) plot of the in-situ EIS data.** These spectra attributed to bare Zn (**a**) and LAPO@Zn (**b**), after cycling. The P3-P5 peaks are attributed to the interfacial charge transfer impedance (Rct). (Specific parameters can be found in Supplementary Table 1).

By conducting DRT analysis towards the *in-situ* EIS spectra, we partitioned the time constant into seven segments, where P2 corresponds to the solid-electrolyte interphase (SEI), and P3-P5 corresponds to the interfacial charge transfer resistance (Rct). For the bare Zn electrode, a distinct P2 peak appeared after 1 h of discharging at 1 mA cm-2, which remained after 1 h of charging at 1 mA cm-2, indicating the irreversible formation of ZHS-contained SEI. In contrast, in the LAPO@Zn system, the signal of P2 peak is weak after one discharge and disappears when charging back, suggesting that the amount of ZHS generated on the LAPO@Zn surface is sparse and reversible. Consequently, the variation in the Rct of the LAPO@Zn surface is also remarkably small due to the significant suppression of surface byproducts, whereas the Rct of the bare Zn becomes significant after cycling.


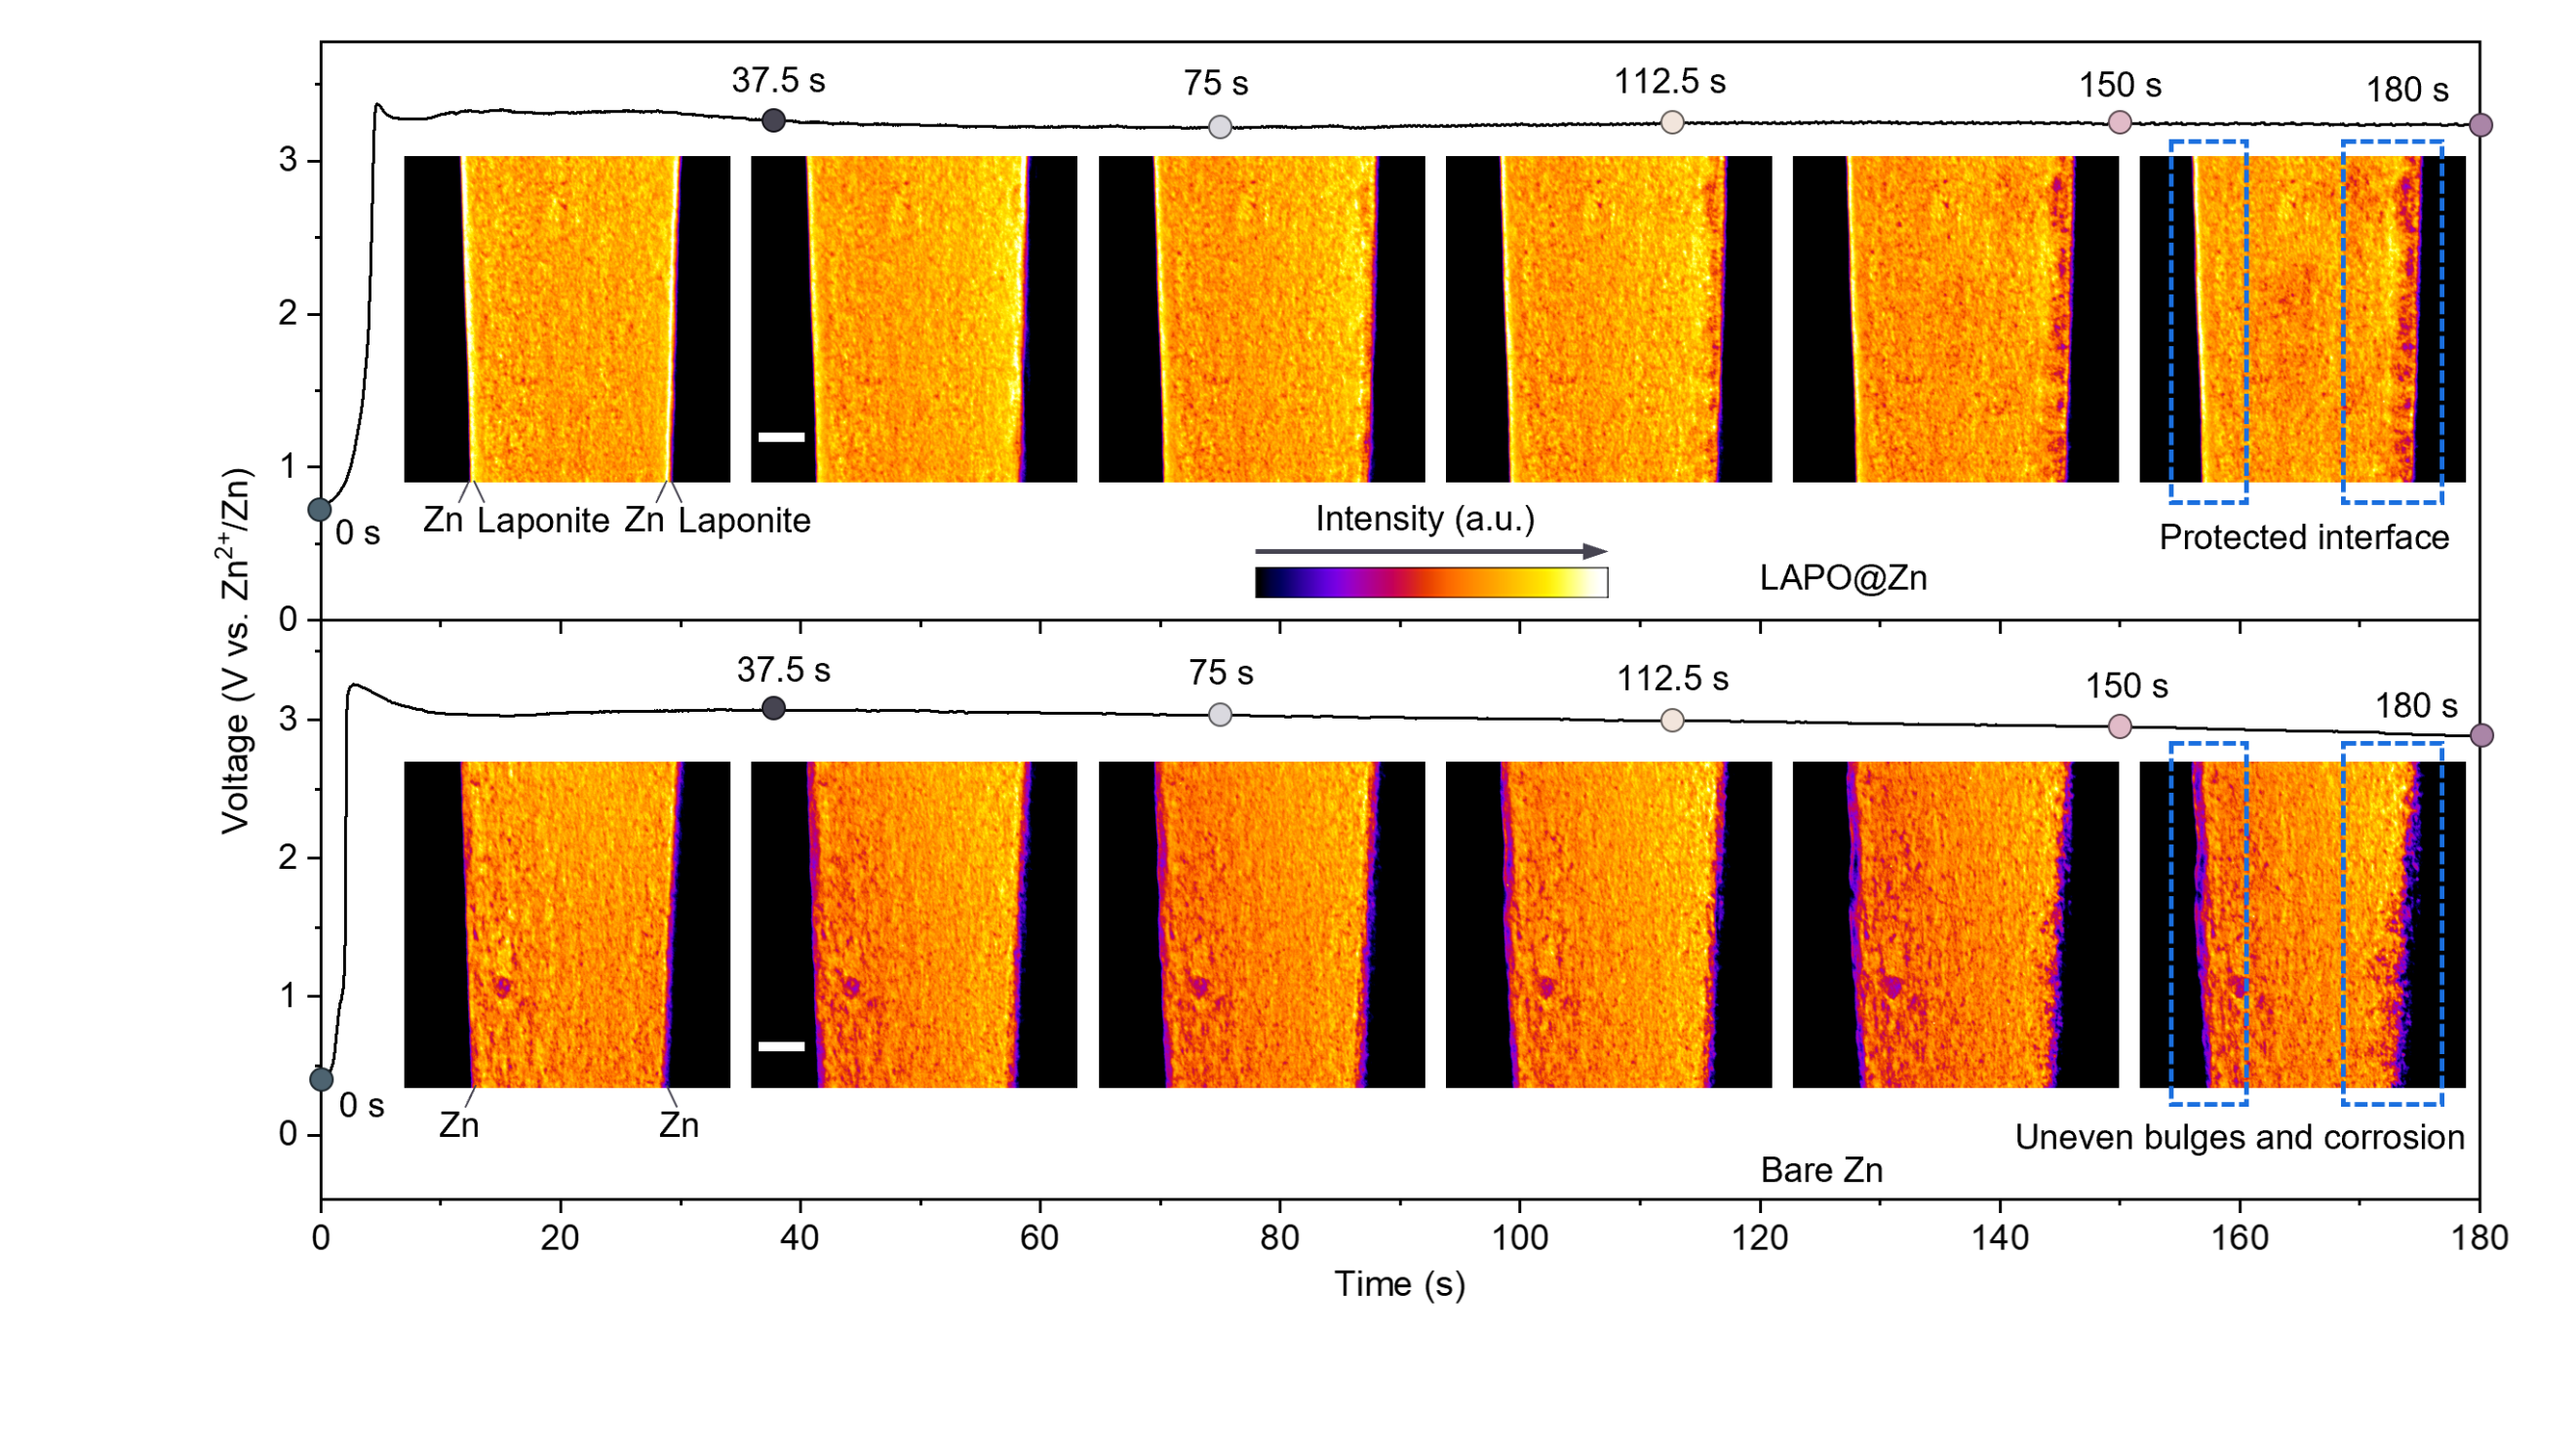


**Supplementary Figure 19. Operando X-ray radiography of symmetrical cells with bare Zn and LAPO@Zn electrodes. The scale bar in the images represents 50 μm.**


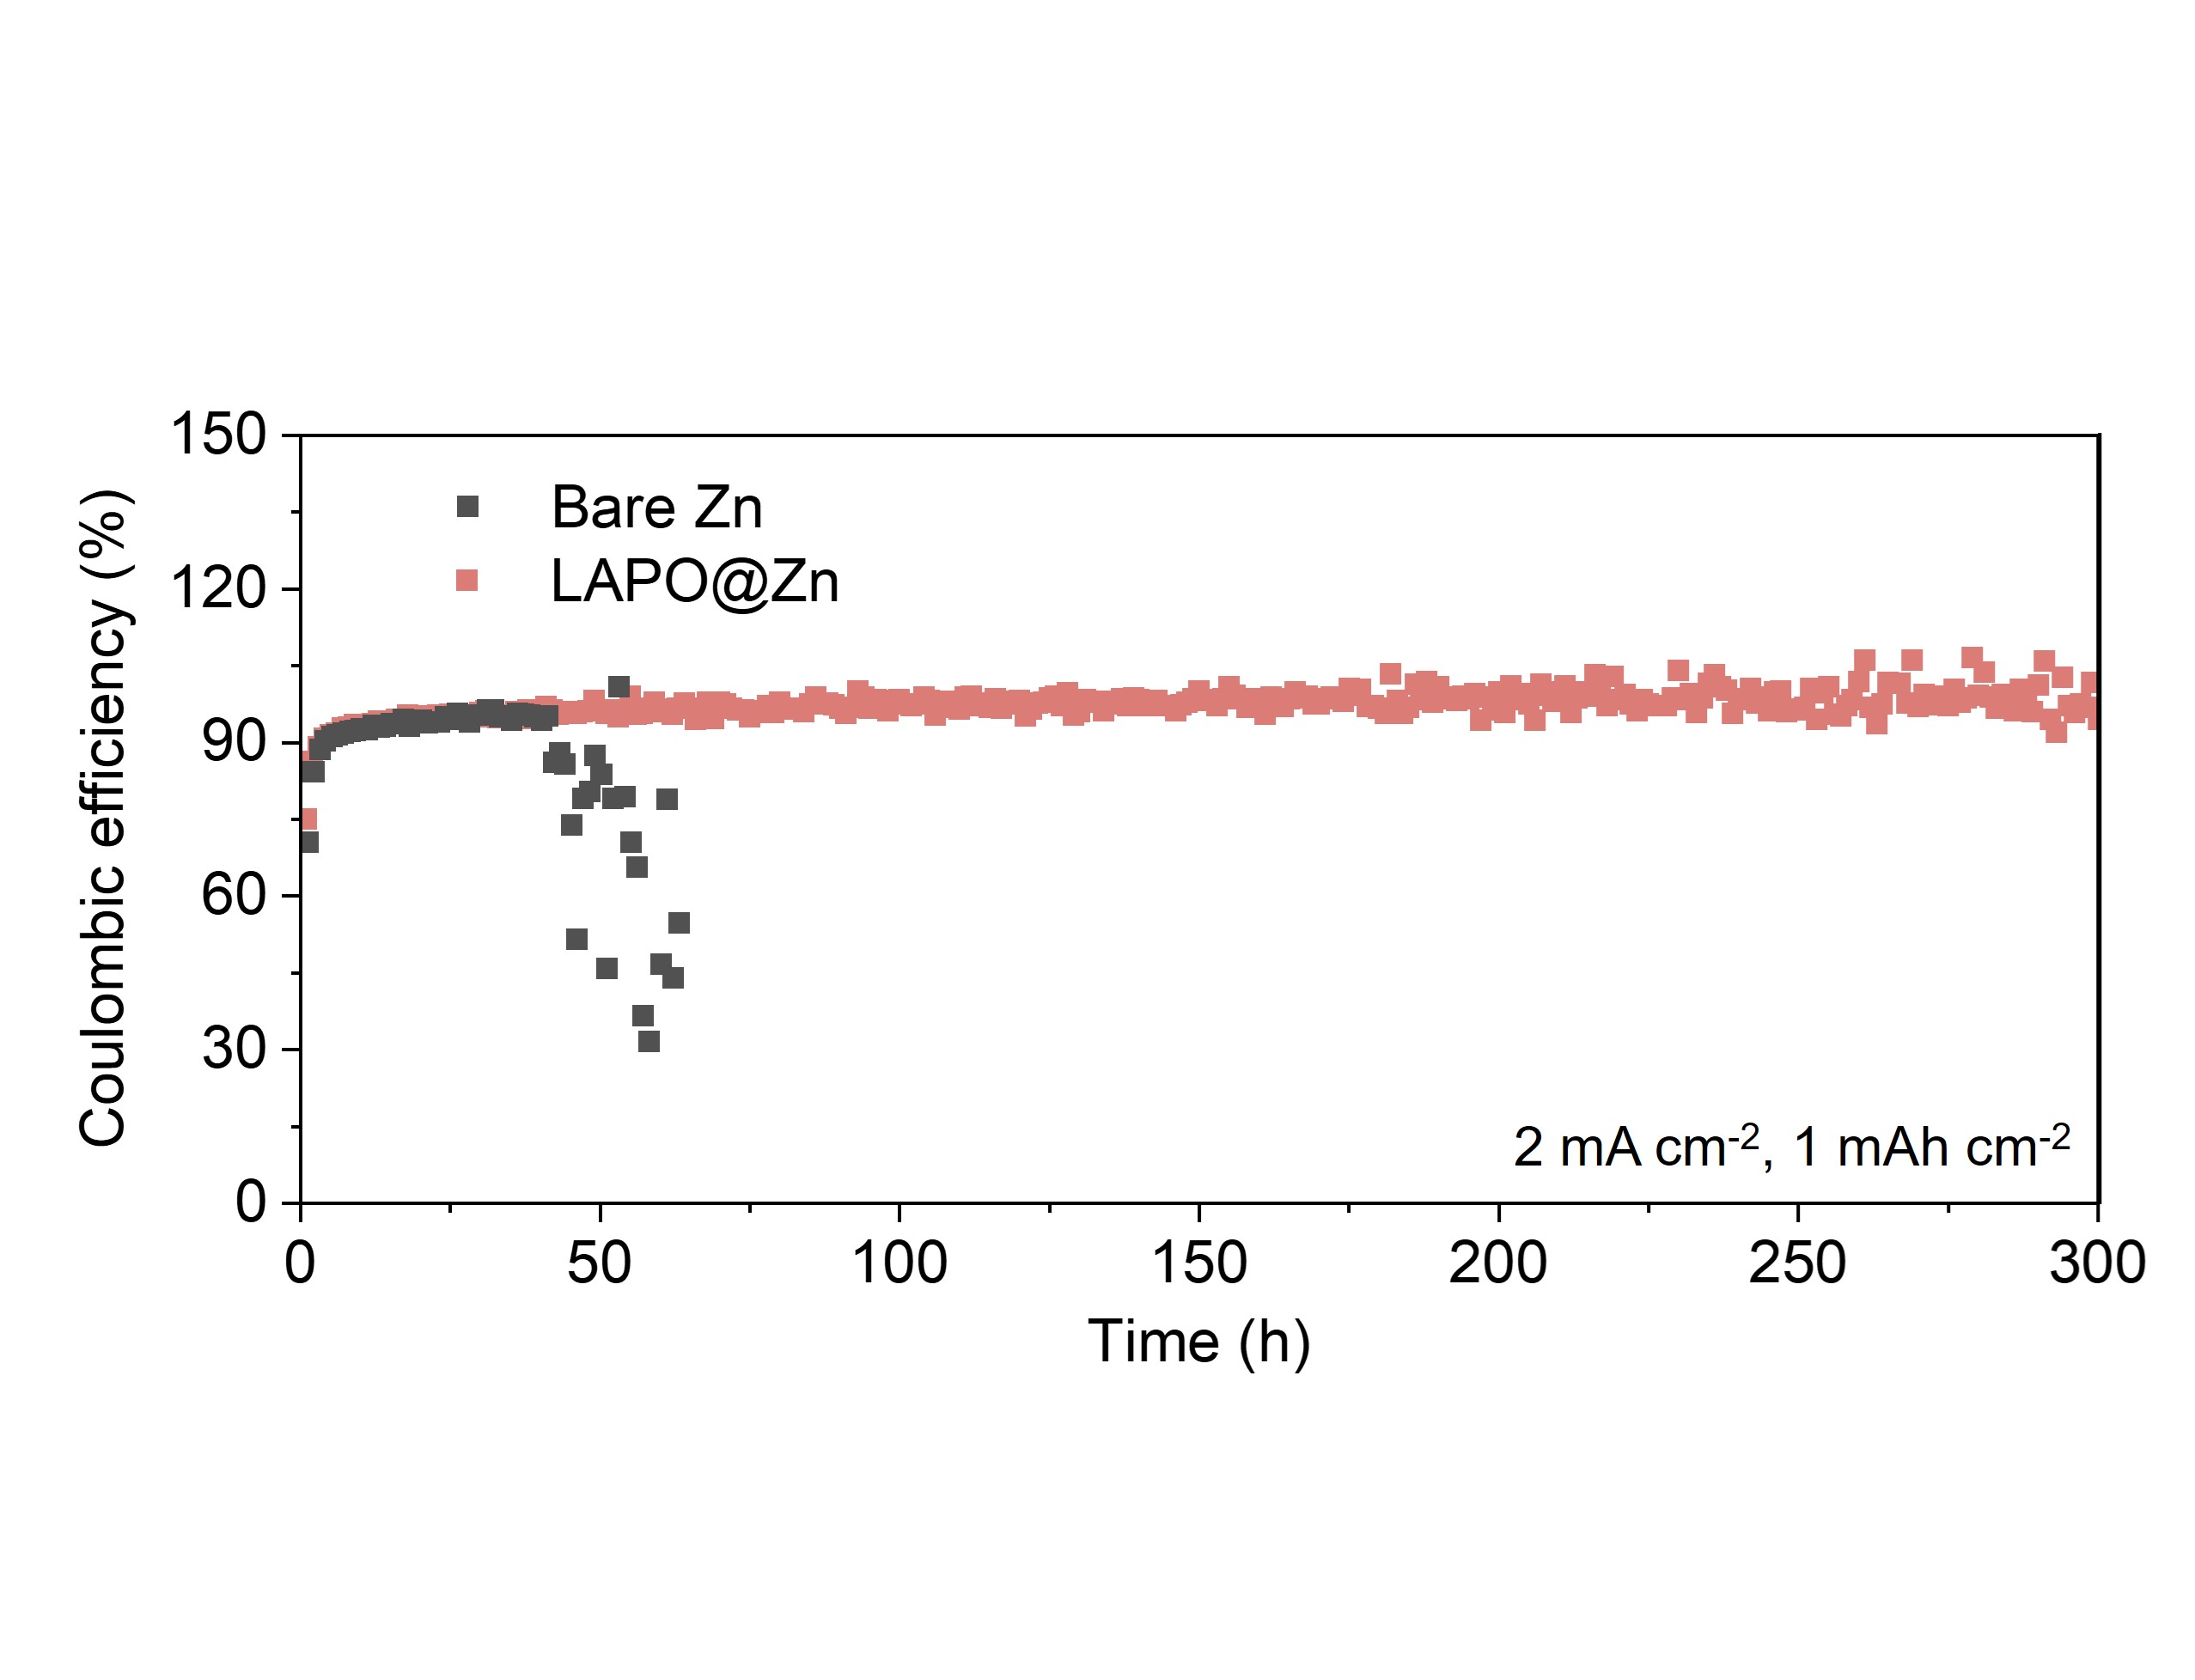


**Supplementary Figure 20. Coulombic efficiency (CE) profile of Zn||Cu coin cells using bare Zn and LAPO@Zn anodes at 2 mA cm-2, with a fixed capacity of 1 mAh cm-2**.


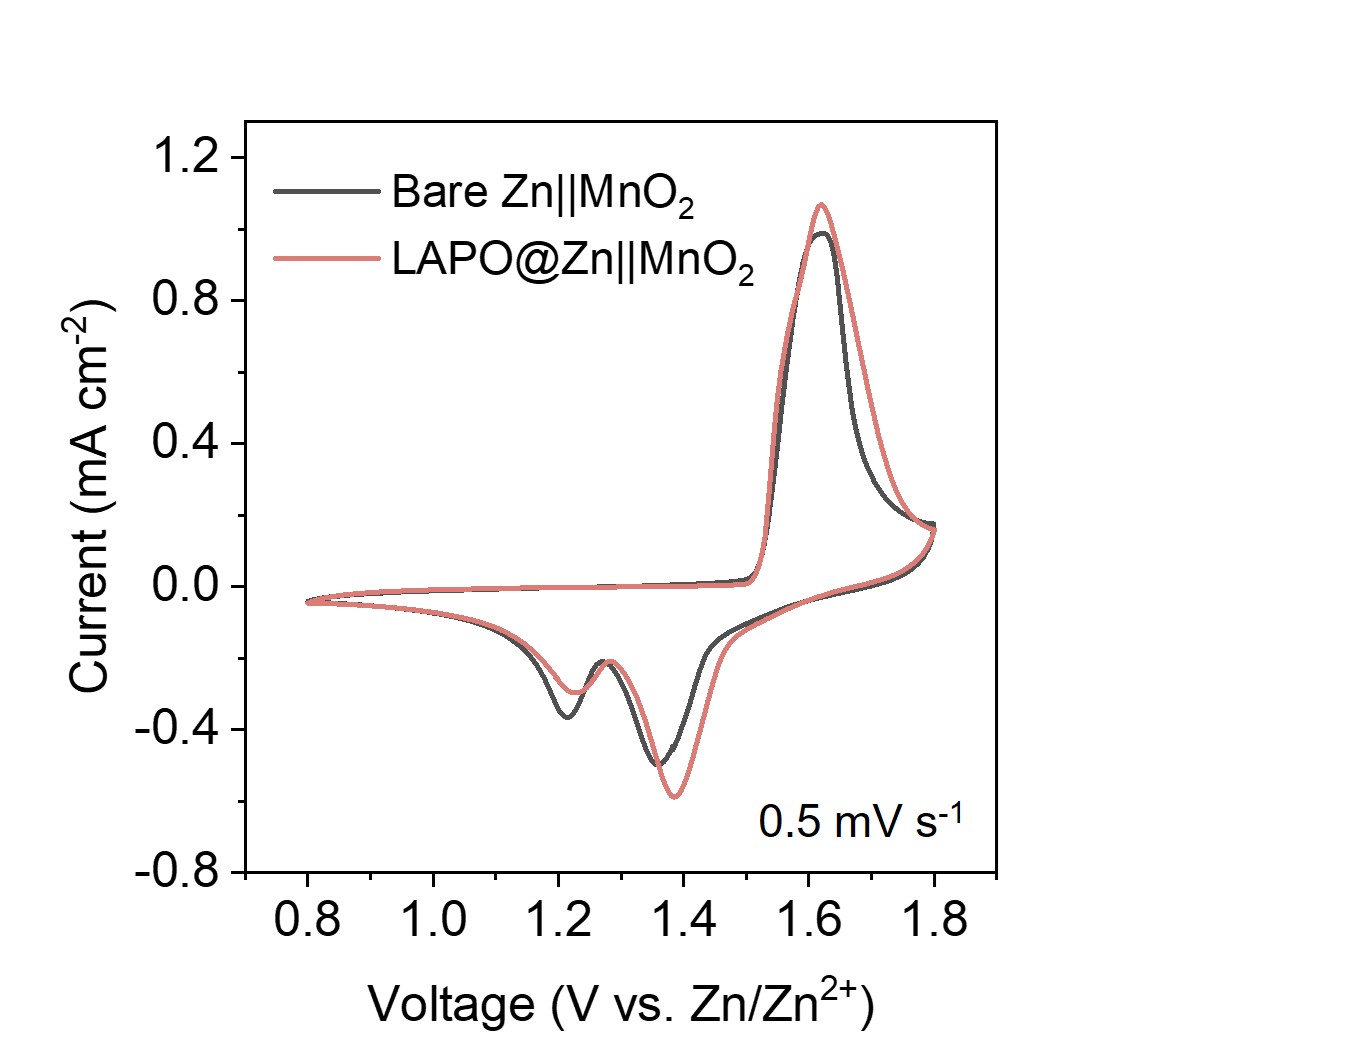


**Supplementary Figure 21. CV curves of bare Zn||MnO2 and LAPO@Zn||MnO2 coin cells at a scan rate of 0.5 mV s-1**.


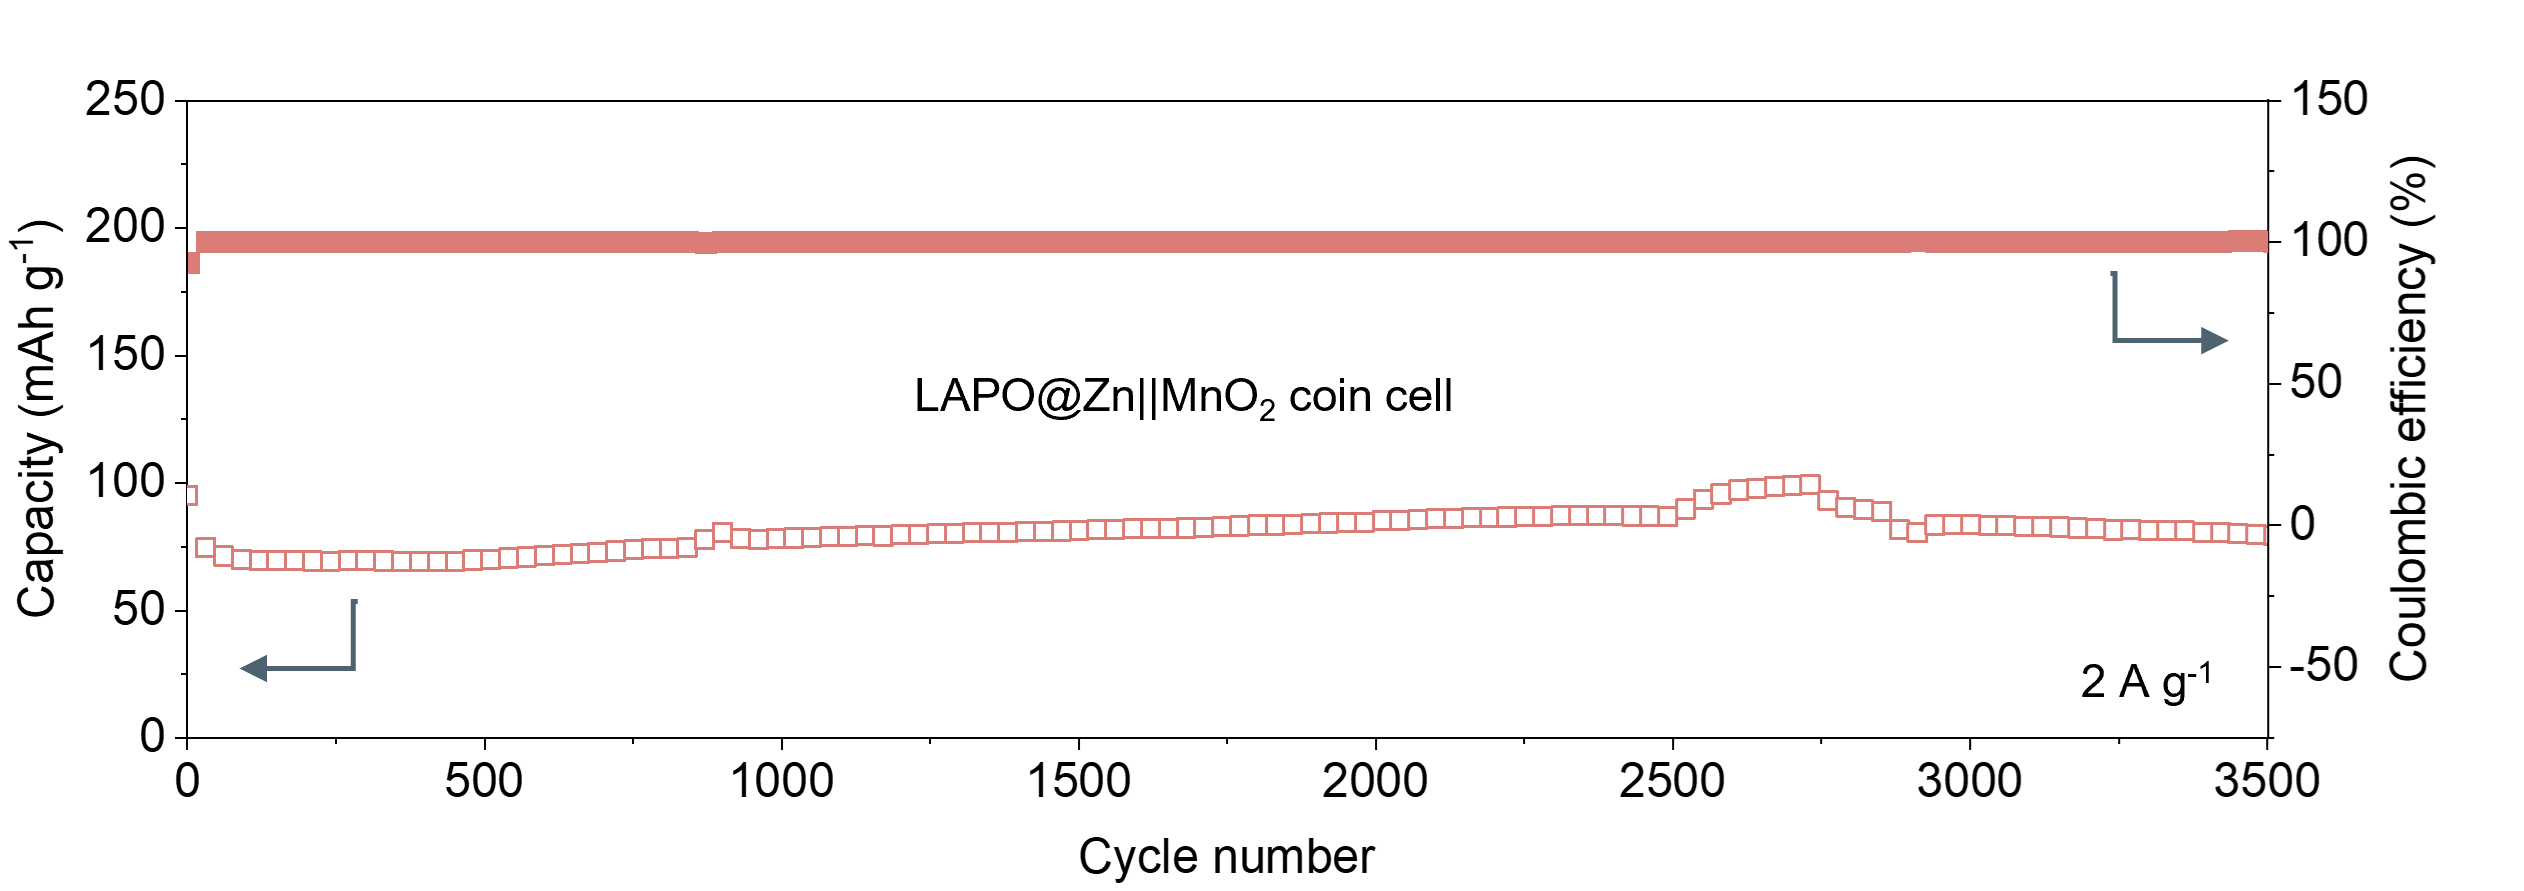


**Supplementary Figure 22. Galvanostatic cycling performance of Zn||MnO2 coin cells at 2 A g-1**.


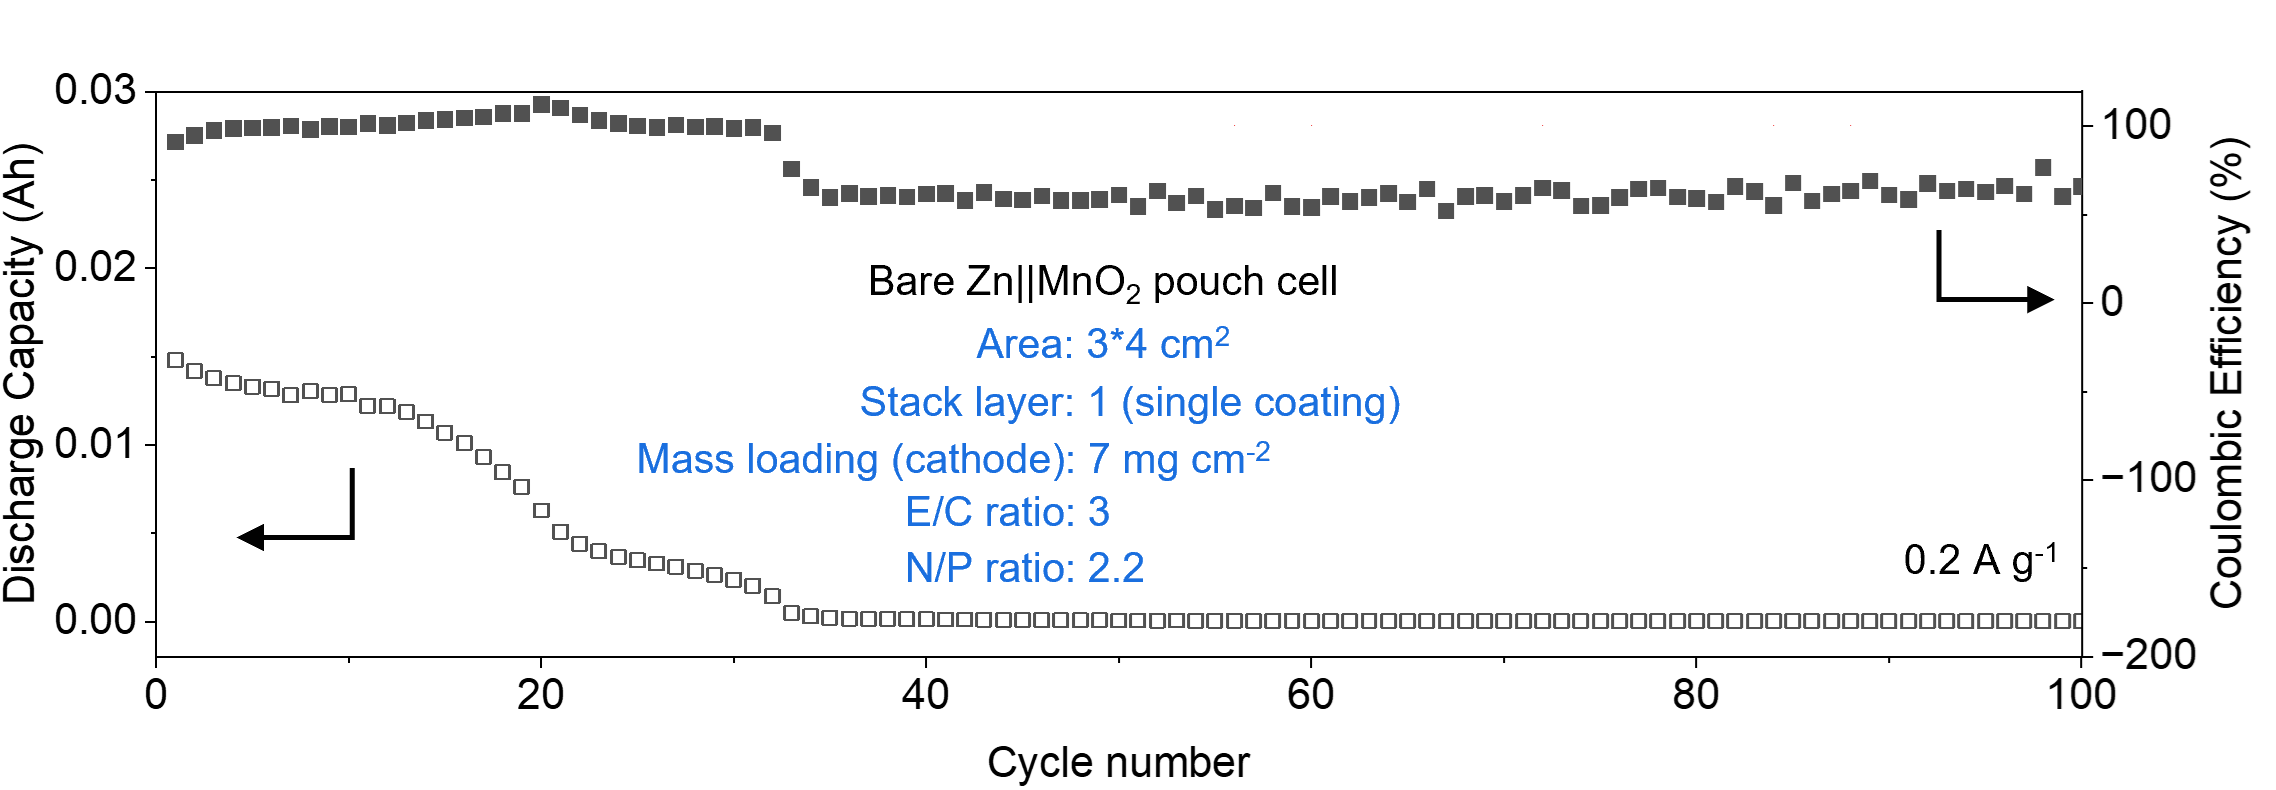


**Supplementary Figure 23. Galvanostatic cycling performance of the bare Zn||MnO2 pouch cell at 0.2 A g-1**.

**Supplementary Notes**


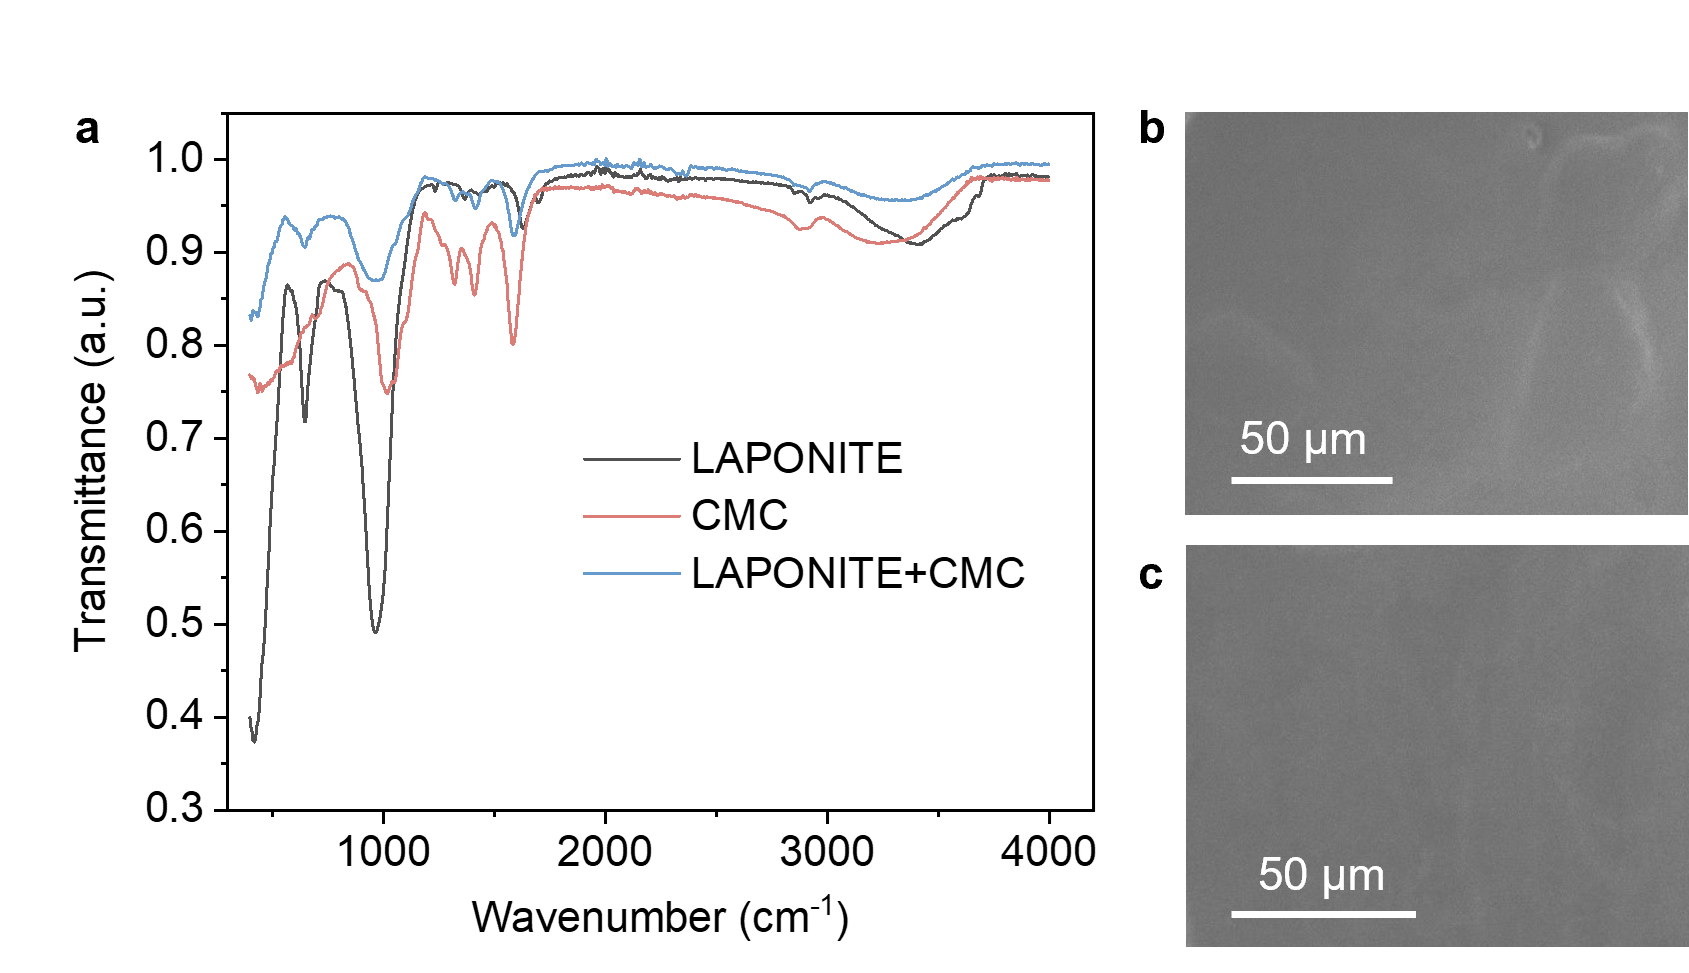


**Supplementary Figure 24. Additional investigations of LAPO@Zn. a,** Fourier transform infrared (FTIR) of LAPONITE, CMC, and assembled coating composed of LAPONITE and CMC (LAPONITE+CMC). The peaks of LAPONITE+CMC are similar to those of the initial LAPONITE and CMC, indicating that our cell fabrication process does not significantly change the nature of LAPONITE. **b,c,** SEM images of the LAPONITE+CMC. The morphology of LAPONITE+CMC is presented differently from Fig. 3**a,b** in the main text, eliminating the possibility that the cubes are from LAPONITE or CMC.


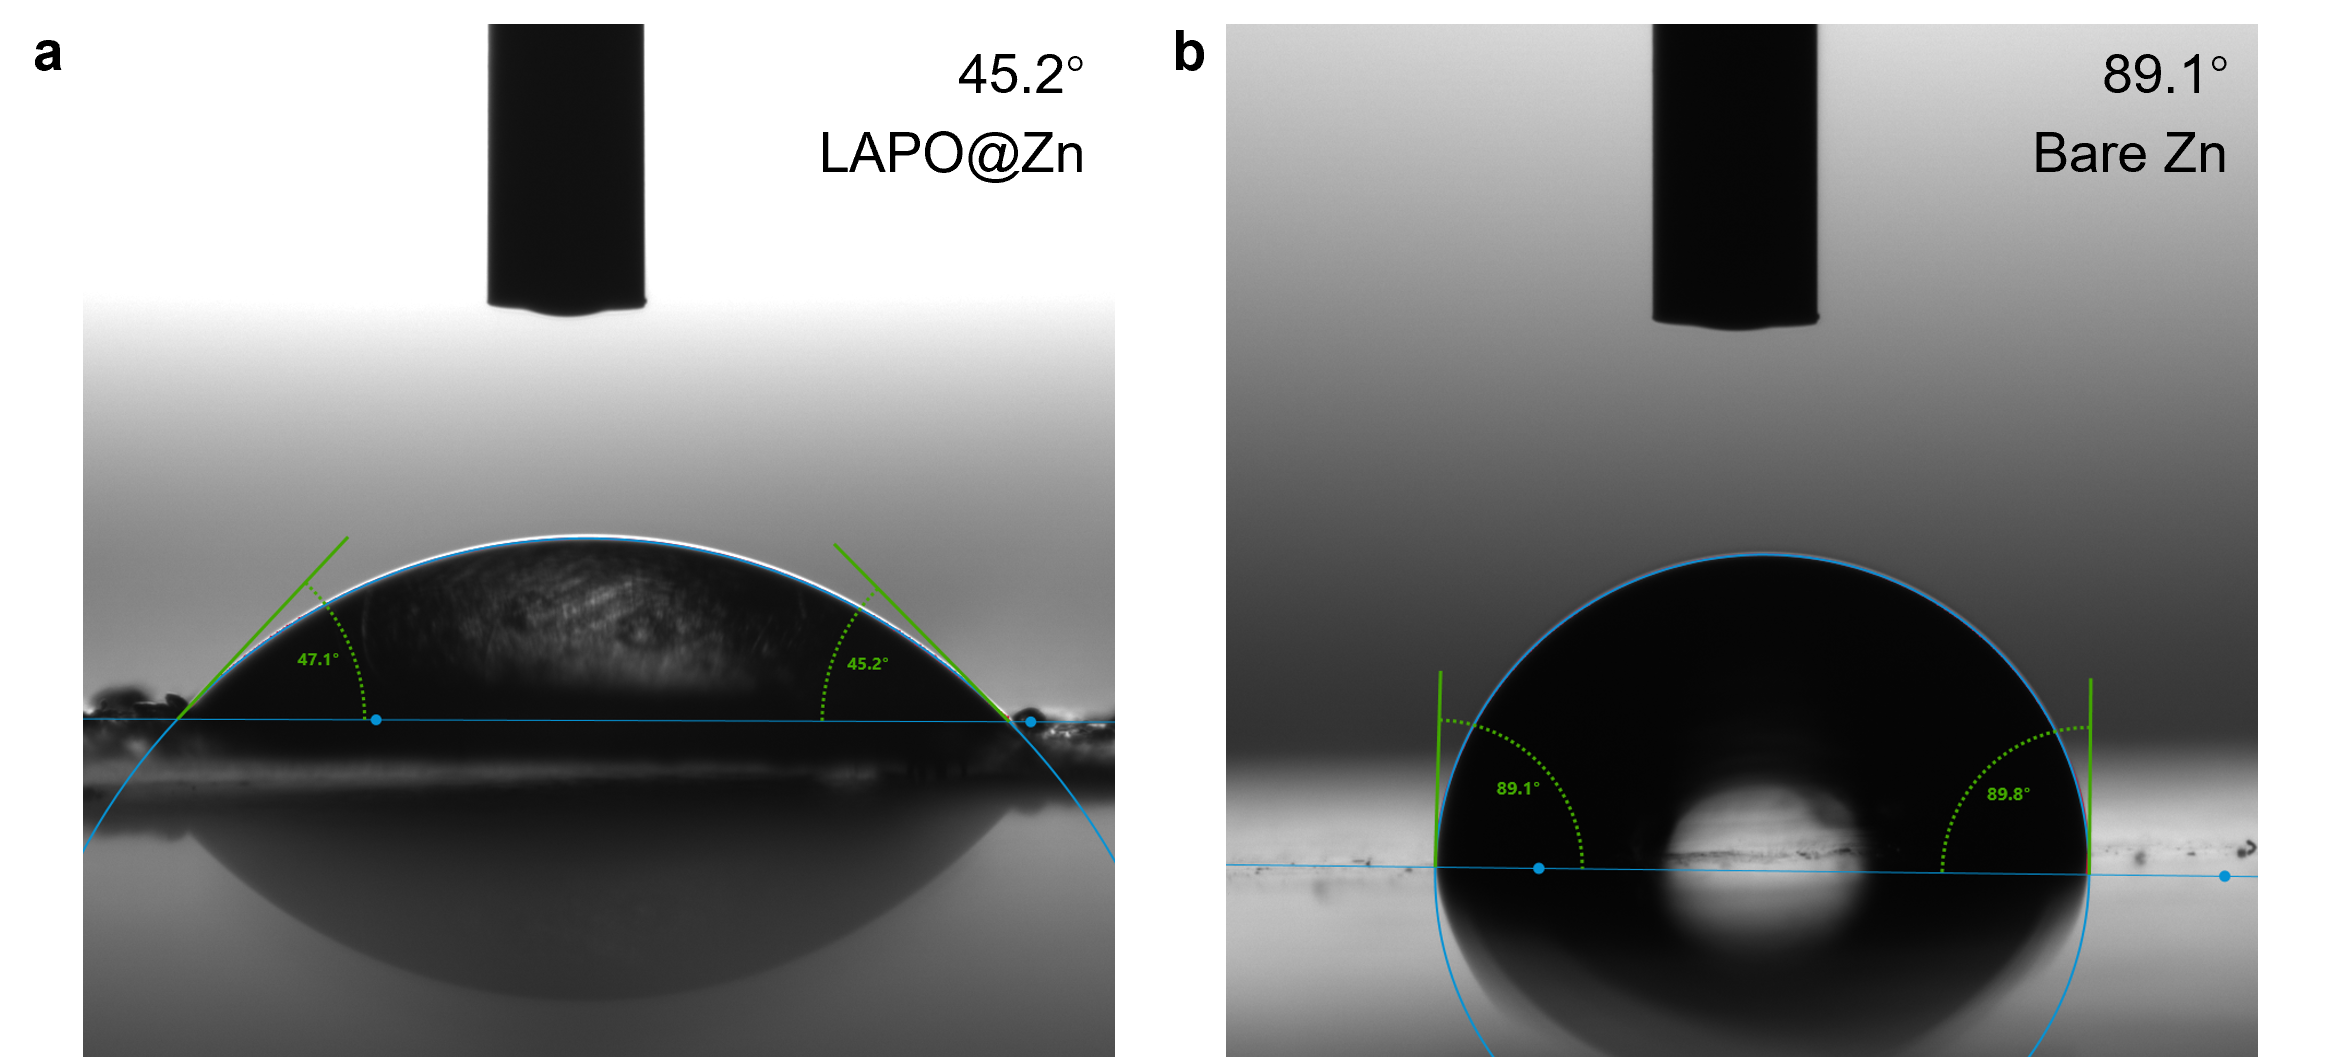


**Supplementary Figure 25. Contact angle test on bare Zn and LAPO@Zn anodes.** The contact angle of water on the LAPO@Zn surface is 45.2°, which is much smaller than that of bare Zn surface (89.1°), suggesting that LAPONITE interlayer favors electrolyte penetration and may contribute to Zn2+ diffusion.


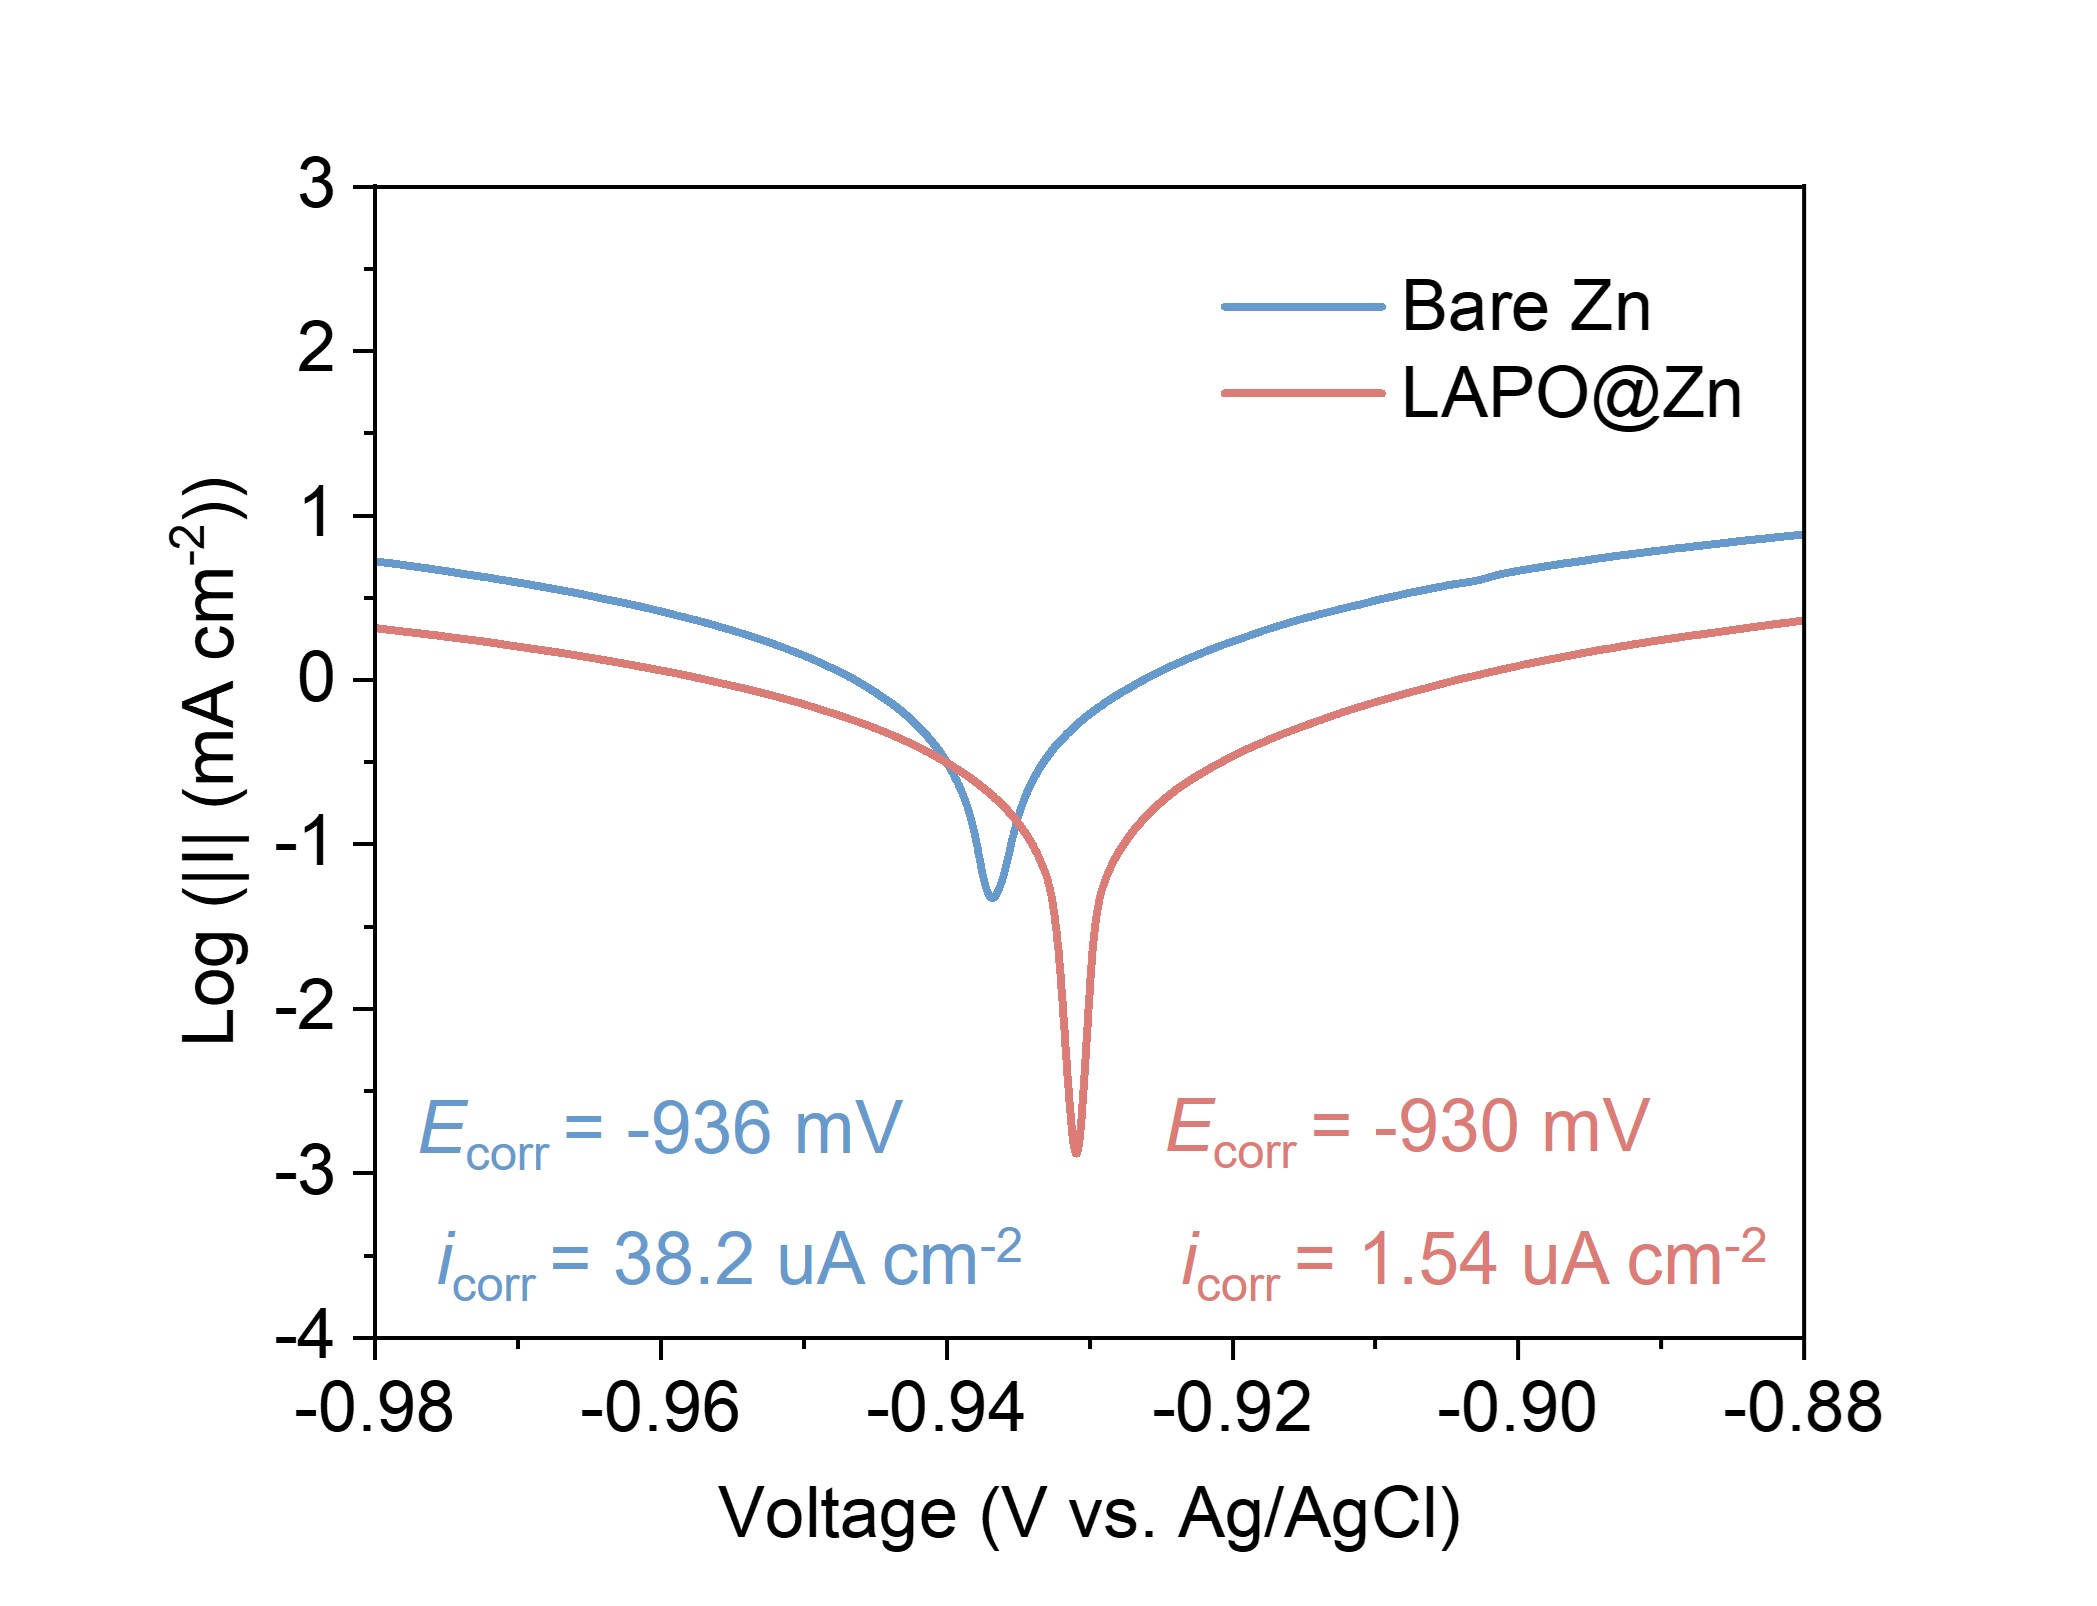


**Supplementary Figure 26. Linear polarization curves of bare Zn and LAPO@Zn anodes.** The corrosion is inhibited through the introduction of the LAPONITE interlayer.


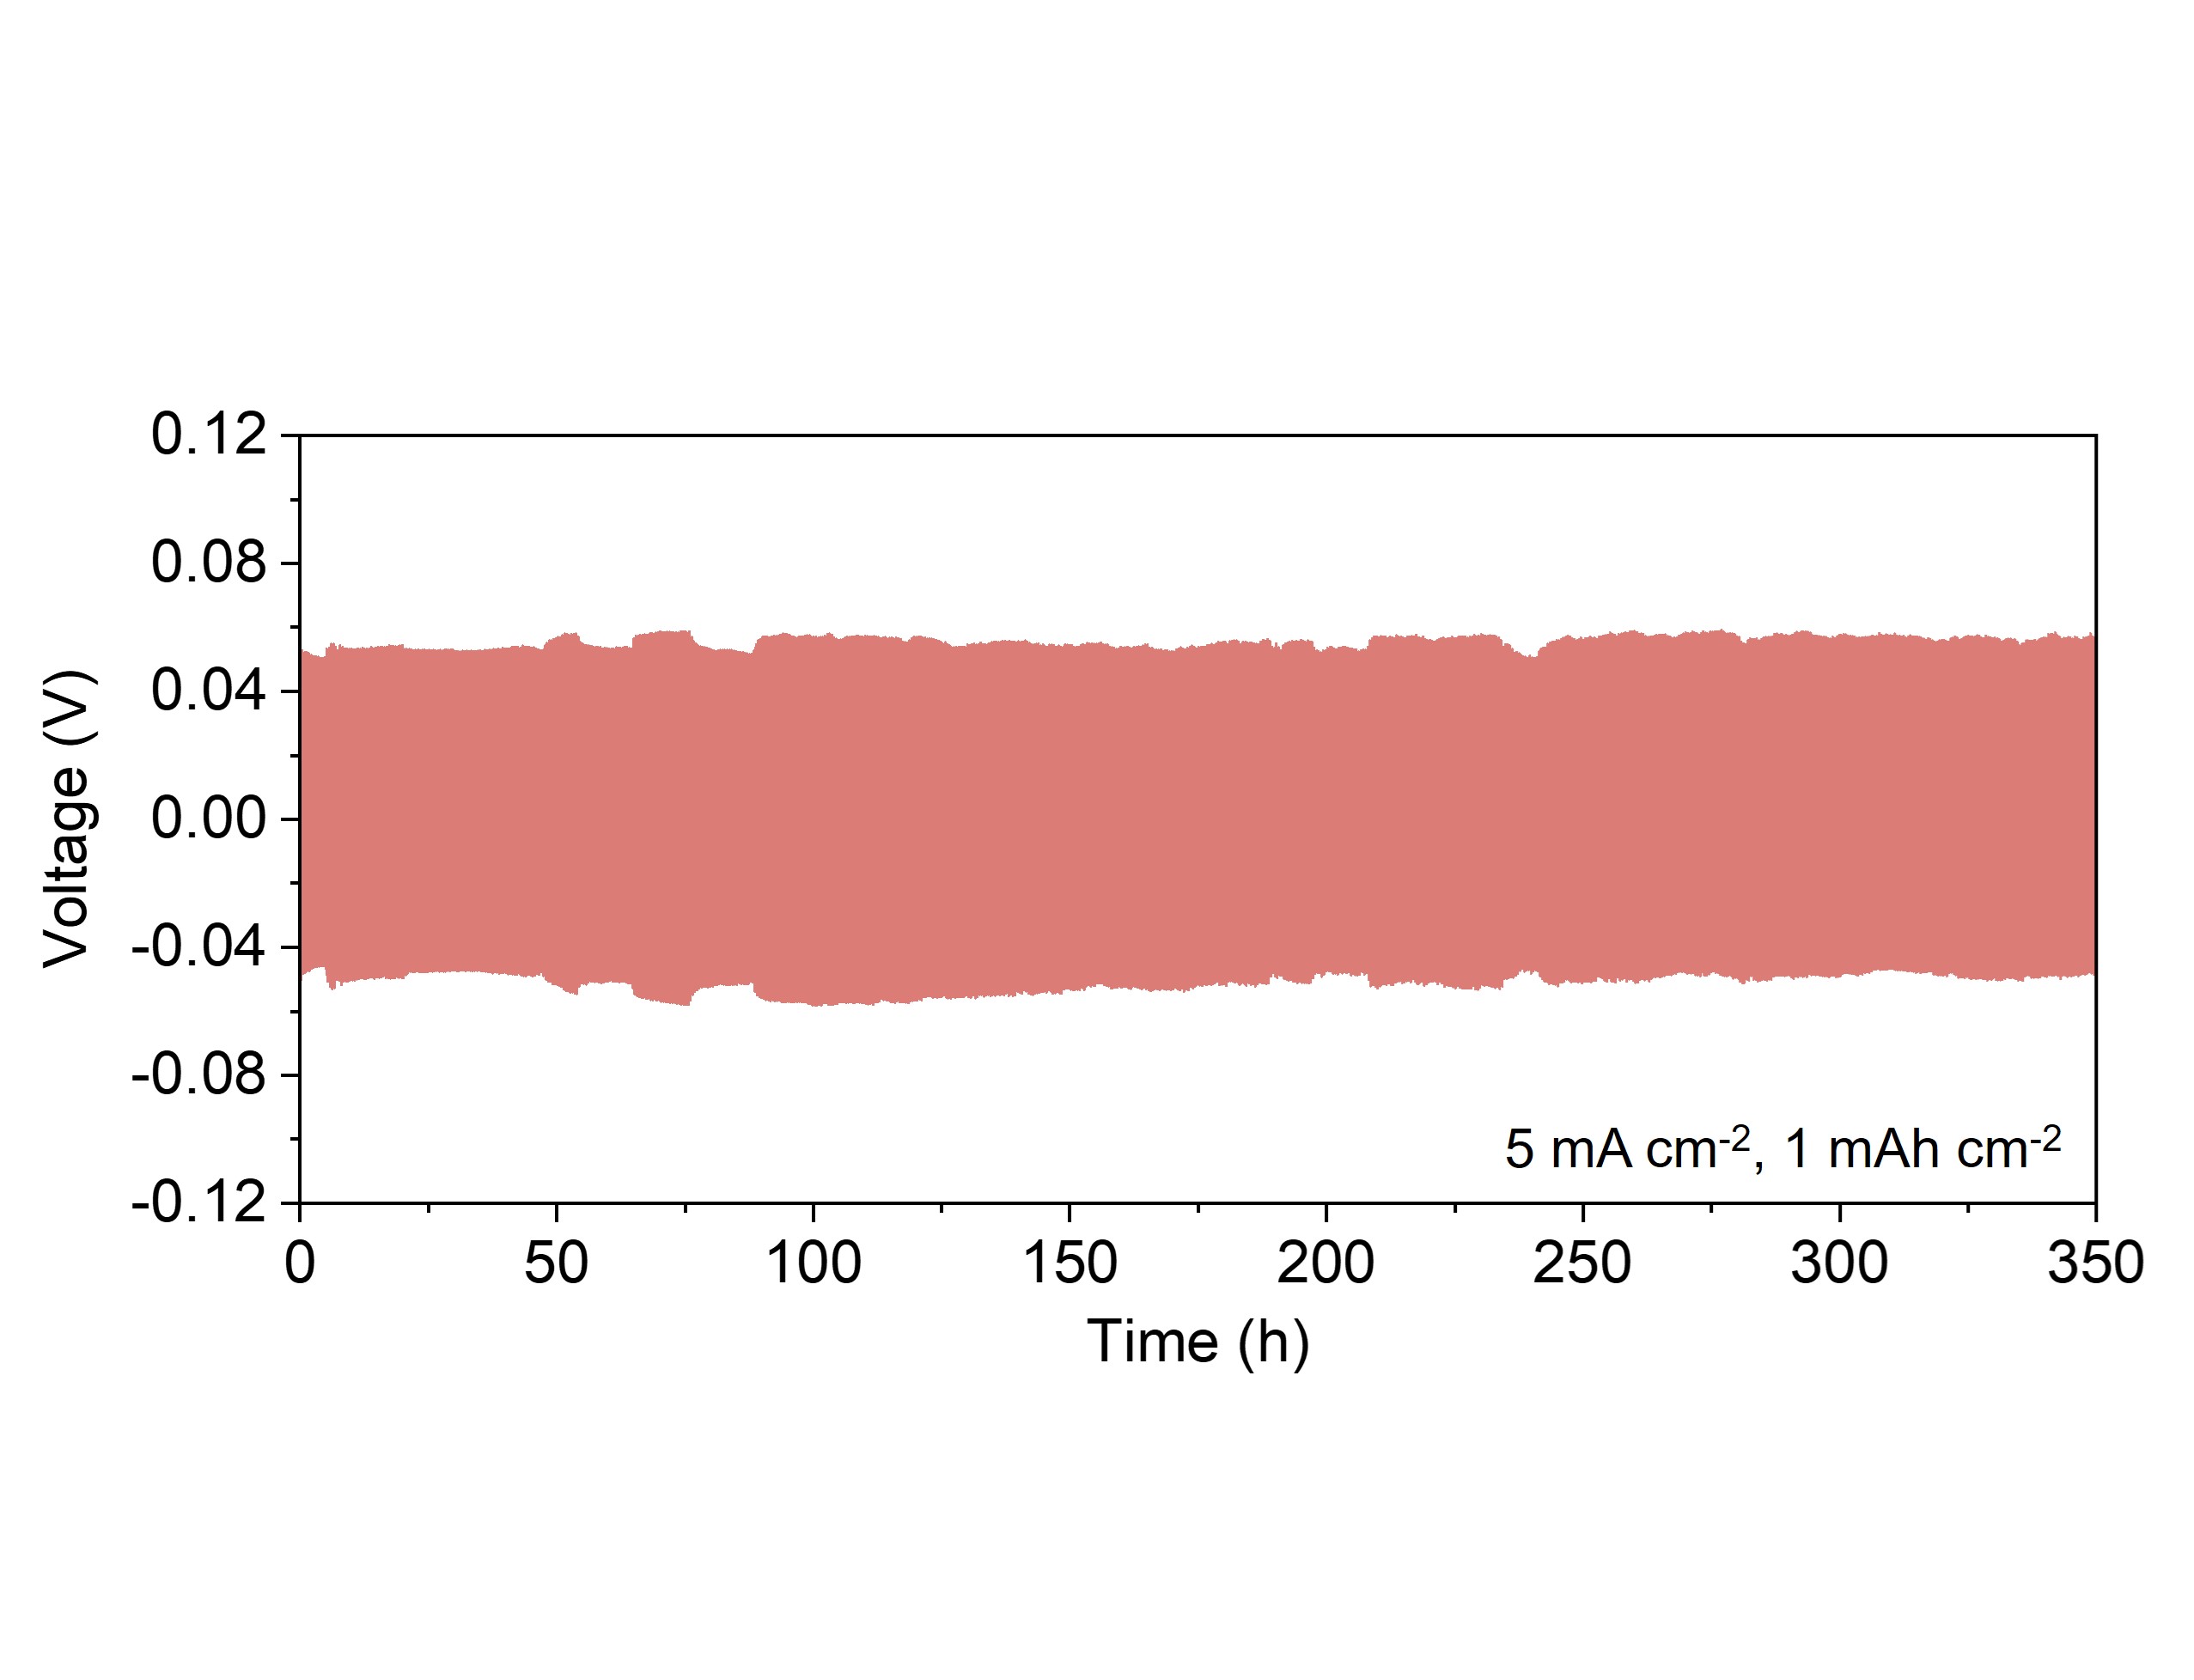


**Supplementary Figure 27. Galvanostatic cycling curves of Zn||Zn symmetric cells at 5 mA cm-2 with a fixed capacity of 1 mAh cm-2**.

**Supplementary Table 1. Summary of application of DRT peaks calculated for a Zn||Zn symmetric cell.**

| DRT Peak | Approximate time constant, τ | Assignment |
| --- | --- | --- |
| P1 | 11.22-12.88 µs | Double-layer relaxation |
| P2 | 19.5-22.38 µs | Solid-electrolyte interphase |
| P3 | 0.14-0.16 ms | Positive electrode charge transfer |
| P4 | 2.19-3.6 ms | Positive electrode charge transfer |
| P5 | 32.3-53.7 ms | Positive electrode charge transfer |
| P6 | 0.54-0.7 s | Diffusion |
| P7 | 5.75-6.1 s |

**Supplementary Table 2. Concentration of elements in the electrolyte in LAPO@Zn symmetric cell systems from inductively coupled plasma (ICP) results.**

|  | Mg (mg L-1) | Zn (mg L-1) |
| --- | --- | --- |
| Before cycling | 132.8 | 2,644,192.8 |
| After 50 cycles | 1,725.7 | 2,573,247.7 |

The Mg element concentration in the electrolyte (from dissolved LAPONITE) after cycling increases slightly, indicating the LAPONITE can be stably presented in the system during cycling.
